# Supplementary material for: High Throughput FISH Screening Identifies Small Molecules That Modulate Oncogenic lncRNA MALAT1 via GSK3B and hnRNPs
Source: Noncoding RNA. 2023 Jan 3;9(1):2. doi: 10.3390/ncrna9010002 (PMC9844399; doi:10.3390/ncrna9010002)
Supplement: Supplementary file 1 [file ncrna-09-00002-s001.zip › 221207_Supplement_HTS_raw_data.xlsx]

## Sheet: all
Compound ID	Compound Tags	Robust Z-score: nuclear count	Robust Z-score: c-myc Granules per cell	Robust Z-score: MALAT1 nuclear intensity
14,15-Epoxyeicosa-5Z,8Z,11Z-trienoic acid		0.539265	0.0302624	-0.169735
1,2-Didecanoyl-glycerol (10:0)		-0.110944	0.614155	-0.0634973
1,2-Dioctanoyl-SN-glycerol		0.413511	0.687762	-0.169888
1,2-Dioleoyl-glycerol (18:1)		-0.529511	2.42833	-0.132169
13,14-Dihydro-PGE1		-0.562473	0.641787	0.150291
13-Keto-octadeca-9Z,11E-dienoic acid		-0.0617433	1.03804	-0.29857
16,16-Dimethyl-prostaglandin E2		-0.676642	0.564795	-1.94071
1?,25-Dihydroxyvitamin D3		0.361167	0.639007	-0.353623
2',5'-Dideoxyadenosine		0.886179	-0.847294	-0.738624
2,3-Dimethoxy-1,4-naphthoquinone		-5.7903	-2.17447	-3.84046
2,5-Ditertbutylhydroquinone		-0.952098	0.217354	-0.704952
24,25-Dihydroxyvitamin D3		0.399119	0.643435	-1.43873
3,4-dichloroisocoumarin		0.104635	-0.138327	-0.364548
4-Amino-1,8-naphthalimide		1.52015	-3.23927	-1.23105
5,6-Epoxyeicosatrienoic acid		0.523518	-0.561709	-0.738591
5,8,11,14-Eicosatetraynoic acid		-0.122743	-0.502034	-0.860202
5,8,11-Eicosatriynoic acid		0.469426	-0.261367	-0.7293
6,7-ADTN		0.0304806	-0.269114	-1.61412
6-Formylindolo [3,2-B] carbazole		-0.343162	-0.190686	-0.827517
7,7-Dimethyleicosadienoic acid		0.92833	0.714282	1.1044
8,9-Epoxyeicosatrienoic acid		1.06375	0.465422	0.15479
9,10-Octadecenoamide		0.918206	-0.493514	-1.62933
9a,11b-Prostaglandin F2		-0.0749025	0.0792854	-1.18476
9b,11a-Prostaglandin F2		0.981904	0.335752	-1.43188
Adrenic acid (22:4, n-6)		0.939512	-0.291733	0.532089
Anandamide (18:2,n-6)		0.0971151	0.193394	-0.453119
Anandamide (20:3,n-6)		0.580047	-0.111364	-0.297498
Anandamide (20:4, n-6)		0.624301	0.960817	-0.356748
Anandamide (22:4,n-6)		0.425545	-0.413221	0.259745
Arachidonic acid (20:4, n-6)		-0.12836	0.237152	0.517693
Bortezomib, 99%		-2.47109	-4.92639	8.97125
D,L-Venlafaxine HCl		-0.612292	1.41292	0.159814
Dichlorobenzamil: 3`,4`-Dichlorobenzamil		0.743562	0.41418	0.0326094
Diethyl 1,4-dihydro-2,4,6-trimethyl-3,5-pyridinedicarboxylate		0.561705	0.459703	-1.10932
Eicosa-5,8-dienoic acid (20:2 n-12)		-0.432367	0.0638118	1.0542
IRE1 Inhibitor I, STF-083010		-0.100795	0.559313	-0.749315
Ionomycin, Free Acid, Streptomyces conglobatus		-5.654	0.523168	-1.29739
L-690,330		0.319969	-1.75904	-1.23286
L-744,832		0.367449	-0.853393	-1.63074
LY-294,002 hydrochloride		0.162926	0.859834	-1.46554
LY83583: 6-Anilinoquinoline-5,8-quinone LY83583		-10.7842	-10.356	-8.6487
Leukotoxin A (9,10-EODE)		-0.0951551	0.5545	-0.766232
Leukotoxin B (12,13-EODE)		-0.407902	-1.03057	0.812199
Misoprostol, free acid		-0.570465	0.143708	0.0898331
N,N-Dimethylsphingosine		-0.832467	0.220267	-0.409395
Niacin (Known As Vitamin B3, Nicotinic Acid And Vitamin Pp)		0.691543	0.136445	-1.0476
Piperazine dihydrochloride: 1-(2,3,4-Trimethoxybenzyl)piperazine dihydrochloride		0.172903	-0.0905942	0.207585
Pyridone: 3-Hydroxy-1,2-dimethyl-4(1H)-pyridone		0.888055	1.59986	-1.57526
SKI-I, Sphingosine Kinase Inhibitor		-0.520812	-0.5311	2.61331
SKP2-C25, Skp2 Inhibitor		-0.378394	-1.27103	0.365062
SKPin C1, Skp2 Inhibitor		1.07825	-0.488536	-0.237608
Triiodo-L-thyronine: 3,3?,5-Triiodo-L-thyronine sodium salt		-0.461456	-1.16614	-0.277225
Trolox (6-Hydroxy-2,5,7,8-tetrametyhlchromane-2-carboxylic acid)		0.439883	0.467008	-0.367471
WIN 55,212-2 mesylate		0.0402401	-0.686438	-0.777281
Zalcitabine (2',3'-Dideoxycytidine)		-0.537898	-1.85169	0.465185
skp2-C25, skp2 Inhibitor		0.73675	-0.492817	0.0163704
(+)-Griseofulvin		0.396363	0.315272	-1.04839
(+)-Pulegone		0.240114	1.35572	-1.33008
(+)Usnic acid		-0.286815	0.455445	0.524894
(-)-Huperzine A		-0.165056	-4.82425	-0.515989
(R)-(+)-BAY K-8644		-0.290475	-0.515888	-0.469278
(R)-(+)-Methandamide		0.248371	0.28691	0.0829471
(S)-(-)-propranolol HCl		0.408577	-0.248986	-0.62549
(S)-Timolol Maleate		1.13845	-0.555575	0.517873
(�) Clopidogrel hydrogensulfate		0.376445	-0.990693	-1.12517
(�) Isoproterenol�HCl		0.629257	0.732707	-0.315574
(�) Kavain		-0.213227	-0.475607	-1.00845
(�)-Atenolol		0.0689765	-0.483759	-0.232453
(�)-Baclofen		0.823984	0.338676	-0.546666
(�)-Epibatidine		-0.872581	1.41284	-2.64072
(�)11(12)-Epoxyeicosatrienoic acid		-0.0981539	0.841685	0.248713
(�)Bay K8644		0.432631	-0.956408	0.445368
1-Acyl-PAF		0.209438	0.714034	-0.45517
1-Deoxymannojirimycin hydrochloride		-0.359819	0.913297	-0.049193
1-Deoxynojirimycin		0.783106	1.82505	-0.640689
1-Hexadecyl-2-O-acetyl-glycerol		0.253292	-0.356004	0.860492
1-Hexadecyl-2-O-methyl-glycerol		-0.234616	1.36702	0.280035
1-Hexadecyl-2-arachidonoyl-glycerol		0.524066	1.35202	-0.812381
1-Hexadecyl-2-methylglycero-3 PC		-0.309932	1.17714	0.381522
1-Octadecyl-2-methylglycero-3 PC		0.129231	0.500305	1.367
1-Oleoyl 2-acetyl-glycerol		0.105297	0.559923	1.08229
1-Stearoyl-2-lineoyl-glycerol		-0.26613	-0.0688294	-0.407142
1-stearoyl-2-arachidonyl-glycerol		-0.228326	0.201132	-1.90674
10-hydroxycamptothecin		-4.72805	0.172585	-3.08895
12(R)-HETE		-0.395122	0.763827	0.00796682
12(S)-HETE		0.230138	1.43716	0.0137024
12(S)-HPETE		0.70643	0.699301	0.224476
12-Methoxydodecanoic acid		0.270188	0.801152	-0.529701
13(S)-HODE		-0.297316	0.8495	0.384901
13(S)-HPODE		0.157508	0.330914	-0.00896064
13-cis retinoic acid		0.404317	0.224873	-0.460261
1400W�2HCl		0.0781817	-0.294565	0.0700499
15(S)-HETE		0.645069	0.363686	0.441221
15(S)-HPETE		-0.171627	0.874796	0.17511
15-Ketoicosatetraenoic acid		-0.148915	1.83715	0.0827164
15-deoxy-Prostaglandin J2		-0.0146483	1.50582	0.456929
17-AAG		-0.367443	3.8014	0.533743
17-Allylamino-geldanamycin		-0.211006	-1.36946	1.38743
17-Octadecynoic acid		-0.139209	1.0704	-0.883468
17-Phenyl-trinor-prostaglandin E2		0.315164	1.25891	-0.479575
2-APB		-0.129644	-0.900857	-0.957164
2-Arachidonoylglycerol		-1.06022	0.777769	-1.04931
2-Deoxyglucose		1.0861	-0.660239	-1.21446
2-Fluoropalmitic acid		-0.116208	0.782622	-0.409755
2-Hydroxymyristic acid		-0.156132	0.424695	0.384318
2-Phenylphenol		0.198433	0.58577	-0.150892
2-methoxyantimycin A3		-1.92237	1.23142	0.514761
24(S)-hydroxycholesterol		-0.395491	-0.695273	-0.9103
25-Dihydroxyvitamin D3		0.595761	-0.0654189	-1.41164
3-Methyladenine		0.105611	0.0172109	-0.41363
3-aminobenzamide (3-ABA)		-0.44261	-3.56783	-1.4595
4-Aminopyridine		-0.738906	0.929302	0.314365
4-Aminosalicylic Acid		0.703804	0.0948555	0.552335
4-Oxatetradecanoic acid		-0.329665	-0.0617893	0.729066
4-hydroxyphenylretinamide		0.251195	0.922455	1.39858
4�8C		0.610359	-0.591387	1.22272
5'-N-Ethylcarboxamidoadenosine (NECA)		0.634535	-1.67219	-2.36074
5(S)-HETE		-0.257059	1.01166	0.215523
5(S)-HPETE		0.400889	-0.324613	-0.494276
5-Hydroxydecanoate		0.658065	0.981319	0.0199692
5-Iodotubercidin		-7.72459	-14.9581	-6.75004
5-Ketoeicosatetraenoic acid		-0.141806	0.378896	-1.29395
6(5H)-Phenanthridinone		1.00418	5.17264	0.600818
6-Gingerol		0.241155	-0.567515	0.614699
6-Keto-prostaglandin F1a		-0.959163	0.0356782	0.822599
7-Ketocholesterol		-0.19272	0.302191	-0.92092
8-Bromo-cAMP		-0.764323	-0.325417	-1.96497
8-Bromo-cGMP		0.688652	-1.87051	-1.17453
8-CPT-cAMP�Na		-0.719519	0.34884	-0.720237
8-epi-Prostaglandin F2a		0.282063	1.53028	-0.0973776
8-methoxymethyl-IBMX		-1.57361	1.11487	-0.0881871
9(S)-HODE		-0.33744	0.031086	-0.777235
9(S)-HPODE		0.0655537	0.780873	-0.884203
9-cis Retinoic acid		0.292538	-1.20546	-1.4197
?-Estradiol		1.37651	1.74886	-0.858461
A 769662		0.385602	-0.439784	-0.425681
A-23187		-0.691754	-0.732098	0.490685
A-3		-1.84116	1.44578	-0.209727
A23187 Calcium Ionophore		0.774798	3.52224	-1.10528
A23187		-0.62243	-3.36364	1.32277
AA-861		-1.15181	0.275928	0.145506
ABC294640		-0.271515	0.150157	-0.397304
ABC294640�HCl		0.112726	-0.627649	-1.07173
AG-1288�		0.497967	1.09997	-0.588024
AG-1296		-1.08903	3.2	0.694319
AG-370		-0.287593	-0.966451	-1.64028
AG-490		-1.09795	2.72207	1.04296
AG-879		-1.32389	1.83618	-1.11378
AG112		-0.330238	-1.21147	-0.367888
AG1478		0.518067	-2.97149	-0.786703
AG213 (Tyrphostin 47)		1.06176	-2.2539	-0.492039
AICAR		-0.401566	-0.887702	0.492973
AL-8810		0.535647	3.23495	-1.64059
ALLN		-0.708262	-3.50507	1.44748
AM 92016�HCl		0.218178	0.736147	0.573529
AM-251		0.41278	-0.101209	-0.0854538
AM-580		1.48934	-0.184664	-0.949022
AR-C155858		-1.16284	-0.788285	0.642113
AS605240		0.336046	-1.16366	-1.18739
AZD8055		-0.687896	-1.86176	0.787078
Abacavir Sulfate		-1.41538	0.943036	0.552386
Abacavir		-0.282553	-0.211213	-0.173152
Ac-Leu-Leu-Nle-CHO		-2.1617	1.05622	4.38587
Acamprosate		0.283392	-0.527717	1.03468
Acarbose		-0.917781	-0.356858	-1.0428
Acebutolol�HCl		0.575592	-0.352465	-1.20701
Acenocoumarol		-0.255057	-0.741892	-2.07529
Acetaminophen		0.639356	-0.0637338	-1.36106
Acetazolamide		-0.436098	-0.437189	-2.0761
Acetohexamide		0.53192	-0.805049	-0.957407
Acetohydroxamic Acid		0.402282	-0.190368	-1.04245
Acetyl (N)-s-farnesyl-l-cysteine		-0.988088	0.639629	-0.507779
Acetylcholine Chloride		-0.213742	1.07398	-0.554931
Acetylcysteine		0.695323	0.00315613	-1.05643
Acetylsalicylic acid		0.325735	-0.0073154	-1.01836
Acitretin		0.841975	-0.104096	-0.517224
Aconitine		0.244194	0.718705	0.0354197
Acrivastine		1.04944	-0.0884617	-0.247434
Actinomycin D		-9.21428	-23.5827	-6.3509
Acyclovir (Acycloguanosine) Zovirax		0.925148	0.946004	-0.573845
Adapalene		0.561676	1.02071	-0.94561
Adefovir Dipivoxil		-0.858572	-0.267629	-0.211847
Adenosine: 5?-(N-Ethylcarboxamido)adenosine		1.48661	0.064469	-0.479323
Adenosine		0.724623	-1.0899	-0.280674
Adipic acid		-0.243297	-0.300935	0.488106
Aflatoxin B1		0.658013	-0.169848	0.772805
Aflatoxin B2		1.48547	-0.325486	-0.428684
Aflatoxin G1		0.374703	-0.516074	0.611241
Agomelatine		-0.94897	1.16557	-0.97007
Akt Inhibitor X		0.77191	0.0538216	1.58899
Akt Inhibitor X�HCl		-1.27503	0.823609	0.990825
Ala-Ala-Phe-CMK		-0.353128	1.23896	0.275547
Alamethicin		0.383146	-0.320563	-1.85497
Albendazole		-0.245756	1.62872	-0.251514
Alendronate�Na Trihydrate		0.589491	0.0298611	-0.593944
Alfuzosin		0.547633	0.287773	-0.416289
Alitretinoin		-0.276923	-2.4238	-1.31207
All trans retinoic acid		-0.749471	-0.671828	-1.80866
Allopurinol		0.828896	-0.34824	-0.556662
Almotriptan		-0.368486	0.140381	-1.86236
Alosetron�HCl		0.399137	-0.618606	-1.57658
Alprostadil		0.425313	1.34735	-1.05798
Alrestatin		0.265277	-1.10137	-1.51277
Altretamine		0.0992695	-0.308903	0.0821879
Amantadine�HCl		-0.0866199	-0.412373	0.693945
Ambrisentan		0.666092	-1.05075	-1.30413
Ambroxol hydrochloride		-1.4464	-1.81225	-1.15843
Amcinonide		-0.458028	0.226284	-0.549223
Amifostine		0.804099	1.06625	-0.307235
Amikacin Disulfate		-0.373116	-0.371416	-0.653301
Amiloride hydrochloride hydrate		0.328607	3.5134	-2.13138
Amiloride�HCl		0.294168	0.451888	-0.505857
Amiloride�HCl�2H2O		1.74825	-0.431511	-0.214802
Aminocaproic Acid		-0.280728	-0.810222	-0.313877
Aminoethyl diphenylborinate: 2-Aminoethyl diphenylborinate		0.281139	-2.78627	-0.464318
Aminohippurate�Na		-0.657786	-0.682308	-0.255618
Aminolevulinic Acid�HCl		-1.00609	-0.536338	-0.311317
Aminophylline		-0.0199162	-0.402147	0.535045
Amiodarone hydrochloride		-0.0772885	1.19802	-0.768658
Amiodarone�HCl		0.2817	0.733303	-0.306015
Amisulpride		0.850134	0.708792	-1.66442
Amitriptyline�HCl		0.438436	-0.466782	-0.0410291
Amlexanox		-0.134966	0.196494	0.336915
Amlodipine besylate		-1.28537	-0.420707	0.892749
Amlodipine		-0.153304	1.82743	0.522899
Amoxapine		-0.220892	0.64869	0.665614
Amoxicillin		-0.995631	-1.01642	-1.26773
Amphotericin B		0.998283	0.409876	-0.928713
Ampicillin Trihydrate		0.682145	-0.389516	-0.144314
Amrinone		0.159961	1.15478	-0.625295
Anagrelide		0.77136	0.908001	0.34407
Anastrozole		0.154202	1.41002	-0.229736
Anisomycin from Streptomyces griseolus		-	-	-
Anisomycin		-7.46522	-0.789357	4.99337
Aphidicolin from Nigrospora sphaerica		-0.859451	2.6981	1.48078
Aphidicolin		0.121839	1.84237	0.097615
Apomorphine�HCl Hemihydrate		-0.0768773	-0.486123	-0.972145
Aprepitant		0.151396	-1.16161	-0.707565
Arachidonamide		-0.234784	0.479019	0.700573
Arachidonoyl-PAF		0.0985803	1.83982	0.704908
Argatroban		0.651705	-0.210864	-1.04743
Aripiprazole		0.764325	-0.461423	1.69728
Aristolochic acid		0.19239	0.23488	-1.94538
Arsenic Trioxide		0.926865	0.595913	1.12708
Artemether		-0.294183	0.000267556	-0.162907
Articaine�HCl		-0.628633	-0.778322	-0.749286
Arvanil		0.153836	-5.09214	-0.793091
Ascomycin (FK-520)		0.395871	-0.614828	0.115951
Ascorbic acid		-0.377501	0.692261	0.0470717
Asenapine Maleate		-0.442694	-1.11228	-1.0448
Aspartame		0.556499	0.212898	-0.516562
Aspirin (Acetylsalicylic Acid)		0.230839	0.458883	0.407683
Atazanavir		0.325425	0.776373	-1.5839
Atomoxetine�HCl		-0.74232	-0.49477	-0.72638
Atorvastatin Calcium		-1.29781	-4.03042	-0.672488
Atorvastatin hemicalcium salt		-2.21191	-3.5882	-1.98229
Atovaquone		1.13404	-0.127569	1.10662
Atpenin A5		0.141012	-0.46882	0.871406
Atracurium Besylate		-0.749647	0.743835	-0.401824
Atropine Sulfate Monohydrate		0.867882	-1.45787	-0.541989
Atropine		0.804179	-0.924347	-0.340724
Auranofin		-	-	-
Azacitidine		1.0779	0.151046	-0.357997
Azacytidine: 5-Azacytidine		-0.53045	6.59523	-0.0391189
Azacytidine		0.174644	4.68663	1.11051
Azathioprine		0.685732	0.822686	1.2864
Azelaic Acid		1.11452	-0.687511	0.38112
Azelastine�HCl		-0.0666814	-0.352957	1.21789
Azithromycin		0.193179	2.29038	-0.745103
Azoxystrobin		-0.418252	1.32568	-2.13273
Aztreonam		0.103637	0.10967	0.0374424
B581		-1.15746	-3.71047	-1.27672
BADGE		0.250398	-2.82531	-1.20616
BAPTA-AM		0.0200606	-3.22772	-1.22594
BI-D1870		1.03154	-0.634524	0.58598
BML-190		0.165892	1.48868	-0.211977
BMS-833923		0.283234	-1.78782	4.22697
BPTES		1.22877	2.1573	-0.718235
BW-B 70C		0.0559835	-2.33393	-1.61374
Bacitracin		0.531826	0.582507	-0.210067
Baclofen		-0.529168	-0.22302	0.484826
Bafilomycin A1 from Streptomyces griseus		-0.347472	-0.877898	0.225869
Bafilomycin A1		0.0119587	-3.21665	-1.34202
Balsalazide		-0.471036	-0.244826	-0.579095
Bambuterol hydrochloride		-0.622906	0.230002	0.416688
Beclomethasone Dipropionate		-0.336956	1.10341	-0.737512
Benazepril�HCl		-0.363438	-0.807394	-1.39462
Bendamustine�HCl		0.521416	0.348859	-0.731614
Bendroflumethiazide		1.08262	0.711693	-0.874181
Benomyl		-1.27233	0.693536	-0.215977
Benzamil�HCl		-0.225659	-0.637521	0.0129206
Benzoic acid		0.407386	-0.307029	0.839561
Benztropine Mesylate		0.86935	0.0971812	-0.26239
Benzydamine hydrochloride		-1.27632	-1.03838	-0.279893
Bepridil hydrochloride		-0.161635	0.954123	-1.04522
Bepridil�HCl		-0.594327	-0.00757453	-0.502657
Berberine chloride form		-1.48916	-0.665753	-1.83314
Bestatin		0.0357999	1.87241	-0.377058
Beta-lapachone		-8.57608	-10.9777	-8.68077
Betaine		0.526476	-0.0717794	0.765059
Betamethasone		-0.430606	0.559155	2.13452
Betaxolol�HCl		0.273203	1.02644	0.660755
Bethanechol Chloride		1.95563	1.07938	0.16008
Betulinic acid		-0.147638	0.452352	-0.26088
Bexarotene		-0.918087	-0.356358	-1.19485
Bicalutamide		0.140013	0.391489	-0.611169
Bimatoprost		-0.228749	0.68087	0.450995
Biotin		0.186332	0.85203	-0.445102
Biperiden�HCl		0.739976	0.552935	0.944008
Bisacodyl		-0.0339866	0.416707	-0.416428
Bisoprolol Fumarate		0.522589	0.155097	-0.765473
Blank		0.213635	0.0105299	0.0142268
Blebbistatin: (?)-Blebbistatin		0.105035	-1.83596	0.203077
Blebbistatin		0.352372	-2.78519	-1.33298
Bleomycin Sulfate		-2.37002	2.28068	3.0508
Boc-GVV-CHO		0.604952	0.697123	-0.411619
Bongkrekic acid		-1.50445	0.972096	1.485
Bortezomib		-2.87033	-1.34107	8.86384
Bosentan		0.14646	-0.730419	-0.492254
Brefeldin A		0.203612	0.875183	-1.06153
Brimonidine		0.626166	0.292156	-1.09539
Bromfenac		0.257562	-0.949445	-1.46606
Bromo-7-nitroindazole		-0.0310957	2.00938	-0.538323
Bromocriptine Mesylate		-0.754249	-0.466027	0.804532
Brompheniramine Maleate		0.606455	-0.981833	0.16891
Budesonide		1.67346	1.33984	1.1313
Bumetanide		0.602103	-1.4247	-1.24764
Bupivacaine�HCl		-0.695397	-1.3304	-1.14895
Bupropion		2.38085	0.990313	-0.0239865
Bupropion�HCl		0.57192	1.06193	-0.772868
Buspirone�HCl		0.271098	0.0742865	-0.238531
Busulfan		1.24261	-0.134744	0.505982
Butenafine�HCl		0.942746	1.19481	0.581069
Butoconazole Nitrate		1.31928	0.379201	0.587521
Butorphanol-(+)-Tartrate (Schedule Iv)		-0.210477	0.332764	0.568461
C-PAF		0.482902	0.177971	1.17482
C16 Ceramide		0.166558	0.113431	0.49277
C1		-0.470711	0.130721	-1.66004
C2 Ceramide		0.588677	0.426042	0.201522
C2 Dihydroceramide		1.05569	1.25254	0.019225
C2-dihydroceramide		0.748893	-0.190249	-0.420476
C75		2.07099	0.0799265	-0.902168
C8 Ceramide		-0.0492882	0.475224	0.0724203
C8 Ceramine		0.667824	1.20512	-0.262874
C8 Dihydroceramide		-0.198404	0.9849	-0.0319842
CA-074-Me		0.93247	-0.903473	-1.32479
CAPE		0.355307	1.22379	-1.1583
CAY 10566		0.0392368	-0.290457	-0.862995
CDC		0.2739	-0.916926	0.181854
CGP-37157		0.0530954	0.346316	-1.48163
CITCO		1.73342	0.815398	-1.62095
CK-666		-0.994476	0.966517	-0.886932
Cabergoline		-0.326473	1.01738	-1.84089
Caffeine		-1.27482	0.063178	-0.400825
Calcipotriene		-0.611839	0.0892924	-0.209498
Calcitriol		1.21074	0.407919	-0.293692
Calcium Ionophore A23187		0.0898806	0.666309	0.367202
Calmidazolium chloride		0.978434	-0.800081	-1.68011
Calpain Inhibitor III		-0.0196612	-0.595809	-0.153141
Calpain Inhibitor I		-2.07125	-0.0655099	4.211
Calpain Inhibitor XI		0.788804	-0.994106	1.20851
Calpeptin		0.364082	0.444215	-2.2845
Calphostin C		0.346391	1.13352	-1.47345
Calyculin A		-	-	-
Camptothecin: (S)-(+)-Camptothecin		-3.71403	-0.0637805	-2.73155
Camptothecin		-3.84309	-5.41964	-5.45502
Candesartan		0.584361	-0.248942	1.01427
Cantharidin		-	-	-
Capecitabine		0.409393	0.204547	-0.173767
Capreomycin Disulfate		2.36703	0.395205	0.501989
Capsaicin		-0.540063	0.111281	0.476898
Capsazepine		-1.71214	-1.30518	0.80052
Captopril		0.478916	0.889247	-0.130821
Carbachol (Carbamylcholine ) Chloride		-0.165961	-0.484252	-0.336037
Carbacyclin		1.22469	2.16716	-0.0941029
Carbamazepine		0.822541	0.210649	-0.049834
Carbendazim		-1.4871	0.0572209	-1.37094
Carbidopa		0.643094	-0.70203	-0.581169
Carbinoxamine Maleate		0.505422	0.0793095	0.55965
Carbonyl cyanide 4-(trifluoromethoxy)phenylhydrazone	MALAT1 hits <-3	-1.80473	0.0119194	-5.43377
Carboplatin		0.428455	0.0387771	0.499294
Carglumic Acid		2.03322	0.631135	-0.982779
Carmofur		-0.787881	1.74329	-0.327152
Carmustine		0.920414	-0.473747	-0.820715
Carvedilol		0.569516	-0.844171	1.68876
Castanospermine		-0.541323	-0.058548	-1.10207
Cefaclor		-0.195144	-0.477941	1.19161
Cefadroxil		0.308286	0.496913	1.27886
Cefazolin�Na		0.030191	-1.09327	-0.692134
Cefdinir		1.25178	-0.494302	-0.039567
Cefditoren Pivoxil		0.57393	-1.14888	-1.1142
Cefepime�HCl Hydrate		-0.191322	0.736588	0.948246
Cefixime		1.4862	-0.530156	-0.579826
Cefotaxime Acid		0.588052	0.998154	0.475768
Cefotetan Disodium		-0.392823	-0.343451	0.0769249
Cefoxitin�Na		1.28959	-0.19878	-0.770518
Cefpodoxime Proxetil		0.538922	-0.259779	-0.614766
Cefprozil		1.849	-0.403598	-1.07418
Ceftazidime		0.670786	-0.0499874	-0.343834
Ceftibuten		0.975007	-0.0540369	2.00564
Ceftizoxim�Na		-1.05329	0.0858591	1.75153
Ceftriaxone�Na		1.2225	-0.126173	0.847478
Cefuroxime Axetil		-0.643415	-0.540143	0.223001
Cefuroxime�Na		0.831968	-0.438475	-0.401571
Celecoxib		-0.431953	-0.352476	0.255499
Cephalexin Monohydrate		-0.593833	-0.668683	0.398729
Ceranib 1		-0.0949224	2.80865	-1.06245
Cerulenin		-1.33029	1.01436	2.05193
Cetirizine HCl		0.123148	-0.775234	1.44612
Chelerythrine		-7.44659	-12.0151	-8.9892
Chenodiol (Chenodeoxycholic Acid)		-0.224947	-1.32947	0.230575
Chetomin		-	-	-
Chlorambucil		-0.289034	-0.306523	0.87147
Chloramphenicol		-0.508774	-0.0965181	-0.00442049
Chlorcyclizine�HCl		0.389909	-0.576993	0.624362
Chlorhexidine Dihydrochloride		-0.777617	0.674115	1.34209
Chloroquine Diphosphate		0.537831	0.437275	-0.204952
Chloroquine diphosphate salt		-0.0371712	1.09355	-1.07746
Chloroquine		1.16627	-1.53731	0.282389
Chlorothiazide		-0.174929	-0.601022	-0.425029
Chlorpheniramine Maleate		0.424811	0.567373	-0.0115048
Chlorpromazine hydrochloride		0.508334	0.465973	0.447098
Chlorpromazine�HCl		0.0868986	-0.576902	-0.170871
Chlorpropamide		-0.00912673	-0.137013	-0.224251
Chlorprothixene		0.223833	0.84309	0.486842
Chlorthalidone		1.13363	0.281824	-0.245487
Chlorzoxazone		0.0288851	0.97126	-0.374341
Cholic acid		0.708506	-0.403243	-1.03581
Ciclesonide		1.12959	2.78512	0.49415
Ciclopirox		-0.722857	2.54326	1.26153
Cidofovir		0.637521	1.70643	-0.627422
Ciglitazone		1.13989	0.387842	0.153955
Cilastatin�Na		0.617088	-0.10953	-0.961248
Cilostazol		0.161704	1.30537	-0.676454
Cimaterol		-0.277661	0.765752	-0.435032
Cimetidine		0.351711	-0.868783	-1.01816
Cinacalcet�HCl		0.291034	0.939394	-0.761224
Cincophen		0.413641	-0.288185	-1.39145
CinnGEL 2Me		-0.999098	1.20474	-1.63576
Ciprofibrate		-0.743254	-0.59967	-0.469098
Ciprofloxacin		-0.537431	-0.2623	0.57889
Cirazoline		0.259579	0.884605	-1.82608
Cisatracurium Besylate		0.506525	0.694465	-0.761939
Cisplatin (Cis-Diamineplatinum(Ii) Dichloride )		1.30409	1.45431	-0.445366
Cisplatin (cis-Diamineplatinum(II) dichloride)		-0.00789981	0.521382	-0.111758
Citalopram�HBr		0.861697	-0.508954	0.361652
Citric acid		-0.242101	0.351626	-1.03165
Cladribine		-0.898961	2.39739	0.998883
Clarithromycin		-0.394328	-0.602399	-0.246464
Clavulanate Potassium		1.69322	0.460658	0.0211726
Clemastine Fumarate		-0.848979	0.514524	-0.97664
Clemastine fumarate		0.147169	-0.641322	1.03748
Clindamycin Palmitate�HCl		-0.350081	-0.458007	-1.31602
Clindamycin�HCl		-0.00881574	0.612377	0.491538
Clobazam		1.02785	0.465715	-0.17486
Clobetasol Propionate		-0.141123	1.53078	0.627986
Clofarabine		-0.460544	4.90249	0.0050436
Clofazimine		-0.1817	1.75209	-0.504119
Clofibrate		0.519104	0.232294	0.229112
Clomiphene Citrate		0.245916	-0.0426371	1.82146
Clomiphene citrate salt		1.22601	0.527897	1.1258
Clomipramine�HCl		0.586733	1.03357	-0.470458
Clonazepam		0.701505	1.21977	-1.09759
Clonidine		0.304429	0.320148	-1.58553
Clonidine�HCl		-0.389202	0.46036	0.0791558
Clopidogrel Hydrogen Sulfate		-0.542968	0.321847	-0.129855
Cloprostenol		-0.537829	0.381417	1.88112
Clotrimazole		-0.420772	-0.368235	-0.319717
Cloxacillin�Na		-0.177289	0.777438	-0.819051
Clozapine		0.446486	-0.685095	0.488613
Colchicine		-2.6435	2.14721	0.700792
Colistimethate�Na		0.360351	0.282491	-1.07075
Colistin Sulfate		0.0369868	-0.427127	-0.240317
Collidine		-0.214465	-0.0188844	0.14029
Concanamycin A		0.661889	-0.354176	-0.0391738
Coralgil		-0.0942517	0.407376	1.7759
Cortisone Acetate		0.291426	-0.0768517	0.390253
Cortisone		0.0389474	0.575411	-1.34378
Coumarin		-1.20196	-1.17257	-1.80221
Crizotinib: (S)-Crizotinib		-0.775967	-0.963891	0.939293
Crizotinib		-2.99906	1.24542	1.18744
Cromolyn�Na (Disodium Cromoglycate)		-0.726363	0.424608	1.34394
Crotamiton		-0.627526	-0.868387	-0.428204
Cryptotanshinone		-1.06565	-0.942608	-0.131107
Curcumin		-1.34359	0.554971	0.506617
Cyano-4-hydroxycinnamic acid: ?-Cyano-4-hydroxycinnamic acid		0.361697	0.992253	-0.892448
Cyclo [Arg-Gly-Asp-D-Phe-Val]		-1.14613	-3.46806	-1.54747
Cyclobenzaprine�HCl		0.729878	-0.340307	-0.584582
Cycloheximide-N-ethylethanoate		-0.108286	-0.631428	-0.0786368
Cycloheximide		-3.22275	1.07059	4.4532
Cyclopamine hydrate		-0.638223	-0.449857	-0.903537
Cyclopamine		1.03652	-0.124667	-1.85773
Cyclopentolate		0.952803	-0.624454	-1.06525
Cyclophosphamide (Free Base)		-0.580994	-0.621977	0.533413
Cyclophosphamide monohydrate		0.611108	0.299959	-0.114
Cyclophosphamide		0.527533	-0.412982	-0.555274
Cyclopiazonic acid		-0.297719	-0.233218	1.94166
Cycloserine		0.652868	-0.415195	-1.6537
Cyclosporin A		0.376646	0.337405	-1.34719
Cyclosporine A		-1.34649	-0.0990466	0.63051
Cypermethrin		0.381421	1.06672	-0.385121
Cyproheptadine hydrochloride sesquihydrate		1.33907	1.09979	-0.788554
Cyproheptadine�HCl Sesquihydrate		-0.304526	-0.0735034	-0.0895325
Cysteamine�HCl		1.18829	0.38817	-1.1672
Cytarabine		-2.12138	-0.553051	1.16071
Cytochalasin B from Drechslera dematioidea		-4.96483	-4.04849	1.59577
Cytochalasin B		-3.34086	-2.85117	-0.929997
Cytochalasin D		-5.57524	-7.3696	3.6572
D-Leucine		0.876426	0.372164	0.514195
D-erythro-MAPP		-0.425711	0.736966	0.232016
D12-Prostaglandin J2		0.378537	0.90704	0.962779
D609		0.0632061	-0.19257	0.821292
D609�		-0.272944	-0.0673049	-0.482101
DAPT		0.067508	1.32716	-0.126751
DL-Dihydrosphingosine		0.229257	0.9529	1.3226
DL-Lactic Acid		1.09284	-0.0143224	-0.175265
DL-PDMP		0.0654027	1.03967	0.392528
DL-PPMP		0.168553	1.17919	-0.366792
DMSO		0	-0.00885934	-0.00425034
DRB (Benzimidazole)		0.162827	1.43968	-2.05674
DTT		1.05848	-0.720749	0.120158
Dacarbazine		-0.757826	0.45293	0.246317
Dactinomycin (= Actinomycin D)		-10.1209	-20.5464	-1.61521
Daidzin		1.04799	-0.297109	-0.719228
Dalfampridine (4-Aminopyridine)		0.41866	0.791549	-1.06895
Damnacanthal		-0.690964	0.616652	1.97516
Danazol		-0.750194	-0.595486	0.553168
Dantrolene sodium salt		0.134417	-0.245178	-0.320062
Dantrolene		1.06756	-1.52302	1.7731
Dantrolene�Na		0.91195	0.433083	-0.248057
Dapsone		1.25213	0.407423	-0.937301
Daptomycin		-0.0858607	-0.358255	0.0356386
Darifenacin�HBr		1.80808	-0.739512	0.187353
Darunavir		1.07299	-0.780734	-1.01975
Dasatinib		-1.6349	-5.43001	-3.34593
Daunorubicin�HCl		-	-	-
Decitabine		0.788991	-1.05406	-1.68349
Decoyinine		-0.361895	0.339107	0.452614
Decylubiquinone		0.270157	-0.358313	-0.132061
Deferasirox		0.364	-1.66968	-1.44437
Deferoxamine Mesylate		0.635484	-0.283275	-1.42298
Deferoxamine mesylate salt		2.01329	1.53065	-1.05477
Delavirdine Mesylate		-0.581584	-0.469462	1.25461
Demeclocycline�HCl		1.38257	0.0934334	-1.19083
Deoxycholate�Na		0.000304788	-0.301362	-0.574827
Deoxynivalenol		-4.53148	4.85382	5.65198
Deprenyl		0.440107	-0.649827	0.141419
Desipramine .HCl		1.12396	-0.662287	-0.906743
Desipramine hydrochloride		-1.41925	-0.754618	0.1632
Desipramine�HCl		0.366856	0.612071	-0.342013
Desloratadine		0.225699	-0.389539	-0.270842
Desmethoxyyangonin		1.0724	1.457	-2.41131
Desogestrel		0.129938	1.01191	-0.0225184
Desonide		1.16111	2.26501	1.24596
Desoximetasone		0.966226	1.36925	1.12762
Desvenlafaxine Succinate Hydrate		0.101994	0.197055	-0.965934
Dexamethasone		-0.335339	1.51476	0.0684381
Dexchlorpheniramine Maleate		-0.215887	-0.709084	-0.666231
Dexmedetomidine�HCl		1.24072	-0.873917	-1.19045
Dexrazoxane		-0.578537	-0.625144	-0.509474
Dextromethorphan		1.0899	-0.695621	-0.0903546
Diatrizoate Meglumine		-0.848884	-0.112868	-1.46812
Diazepam		0.270801	-0.466287	-0.45661
Diazoxide		0.861711	0.140598	0.0694202
Dibutyryl cAMP�Na		-0.146583	1.389	-1.62504
Dibutyrylcyclic AMP		-0.945755	1.01924	-0.303626
Dibutyrylcyclic GMP		0.0107398	-0.392954	0.672958
Dichlorobenzamil�HCl		1.08646	-1.48507	2.08554
Diclofenac�Na Salt		0.359046	0.470223	-0.813228
Diclofenac�Na		-0.93798	-0.731077	-0.753984
Dicloxacillin�Na Salt Monohydrate		0.848312	0.864731	-0.229126
Dicumarol		0.274253	0.382784	-1.34347
Dicyclomine�HCl		0.0346195	-0.360703	1.14
Didanosine		-0.202982	0.135238	-0.433698
Dienogest		1.14104	0.567469	1.46462
Diethofencarb		-0.204884	1.16625	-0.237256
Diethylcarbamazine citrate		0.643529	-0.635312	0.785954
Diethylstilbestrol		-0.177656	0.787571	-0.534102
Diflunisal		-0.935255	-0.399874	-0.983222
Difluprednate		0.41206	1.34127	-0.0991023
Digoxin		-2.03032	2.76506	3.27504
Dihomo-gamma-linolenic acid		-0.0935193	-0.204879	1.18354
Dihydrocapsaicin		1.60739	-2.13937	0.437084
Dihydroergocristine mesylate		-8.41244	-10.8871	-10.3521
Dihydroergotamine Mesylate		0.68462	0.910656	0.518337
Dihydromethylsticin		-0.0645385	1.14977	-1.34081
Dihydrosphingosine		0.705534	0.350824	0.974457
Diidolylmethane		-0.0575428	0.00051526	1.46765
Diltiazem�HCl		0.373958	-0.125981	-0.0376204
Dimenhydrinate		-0.854664	-0.464065	-1.21328
Dimethyloxaloylglycine		0.810578	0.334306	-0.427572
Dinoprostone		-0.453325	2.34952	0.58578
Dipalmitoylphosphatidic acid		0.0870515	-0.263502	-0.444158
Diphenhydramine�HCl		-1.81145	-0.096404	-0.464094
Diphenyleneiodonium chloride		-4.30348	2.11296	-2.93925
Diphenyleneiodonium	MALAT1 hits <-3	-2.31656	-1.65379	-4.24374
Dipyridamole		-0.307396	-0.714415	-0.769994
Disopyramide		0.233213	-1.29262	-1.17678
Disulfiram		0.328941	-1.14649	-0.566731
Dobutamine�HCl		1.31191	-0.983945	-1.1828
Docetaxel (Taxotere)		-3.74927	1.72025	-0.195954
Docosahexaenoic acid(22:6 n-3)		-0.118106	0.343269	-0.455415
Docosapentaenoic acid		0.0369163	0.62182	-0.154799
Docosatrienoic acid (22:3 n-3)		0.183355	-0.992049	0.755399
Dofetilide		0.695627	-0.0212619	1.23474
Dolasetron		-0.16281	0.22807	-0.750357
Donepezil�HCl		-1.4134	1.08769	0.373208
Dopamine�HCl		0.525989	2.07233	-0.825349
Doripenem		-0.645795	0.359769	-0.885625
Dorzolamide�HCl		1.08648	0.169959	-0.974472
Doxapram�HCl H2O		0.068664	0.521022	-0.153229
Doxazosin Mesylate		0.466843	-1.24792	0.288596
Doxepin�HCl		0.53364	-1.05593	1.36342
Doxorubicin hydrochloride		-	-	-
Doxorubicin		-	-	-
Doxorubicin�HCl		-	-	-
Doxycycline Monohydrate		-0.307862	-1.68176	-0.763442
Doxycycline�HCl		0.140913	0.372845	1.1946
Droperidol		0.0350388	-0.259986	2.01955
Drospirenone		-0.13262	1.02864	0.391342
Duloxetine�HCl		-0.410832	-0.431499	1.51839
Dutasteride		0.968127	-0.18834	-0.729179
Dyphylline		1.45889	0.865158	-0.0387712
E-4031		0.360318	-0.472711	-0.218963
E-64-d		0.363467	-0.247962	-0.409203
E-Capsaicin		1.21073	0.389775	-1.6279
E6 Berbamine�		1.12478	-1.07103	1.0734
E6 berbamine		0.0813918	-0.305053	-1.21711
EHNA		1.35573	-0.207479	-1.3059
EHNA�HCl		-0.10154	-0.943548	-0.25331
EX-527		-1.7981	1.4657	-0.205809
Ebselen		-1.45938	2.54856	0.9725
Econazole Nitrate		0.276602	0.470592	0.775524
Econazole nitrate		0.425828	0.367442	-1.30011
Efavirenz		0.00509285	-0.623318	0.436262
Eflornithine�HCl		0.809541	0.597629	-0.00312616
Eicosadienoic acid (20:2 n-6)		0.112632	-0.384451	1.19188
Eicosapentaenoic acid (20:5 n-3)		0.275927	-0.175654	1.37807
Eicosatrienoic acid (20:3 n-3)		1.22866	-0.27846	1.30546
Emtricitabine		0.583566	1.7189	0.714159
Enalapril		0.498578	0.505197	0.257312
Enalaprilat Maleate		-0.806619	0.606718	-0.500658
Enantio-PAF C16		-0.712214	-0.780031	1.43505
Entacapone		0.685973	0.496035	0.0508001
Epinastine�HCl		0.00591327	0.332541	-0.578077
Epinephrine (L-(-)-Epinephrine-(+)-Bitartrate)		-0.537534	0.344967	-0.32938
Epinephrine: (?)-Epinephrine		-1.05223	0.577295	-0.121253
Epirubicin�HCl		-8.96705	-23.3098	-1.13013
Eplerenone		0.279039	0.297415	1.13816
Eprosartan Mesylate		1.33692	0.176877	0.453903
Eptifibatide		0.538594	-1.28319	0.621369
Ergotamine Tartrate		0.0876477	-1.07799	-0.319478
Erlotinib		0.874014	0.553573	0.479389
Erythromycin		0.151292	0.250495	0.880003
Escitalopram		0.344696	0.209203	0.946617
Esmolol		0.276863	-0.584985	0.155896
Esomeprazole Potassium		0.823032	-1.50926	0.0157154
Estradiol		-0.22902	0.251906	-0.858517
Estramustine Phosphate�Na		0.0818417	0.898263	1.07716
Estrone		-0.810774	-0.765012	-0.941641
Estropipate		-0.292884	0.680699	0.478074
Eszopiclone		0.524989	0.786354	0.634705
Ethacrynic Acid		-0.246972	-0.157103	0.0112208
Ethambutol Dihydrochloride		0.650348	0.563471	0.413991
Ethinyl Estradiol		-0.137418	1.7916	0.584819
Ethinyl estradiol		0.191886	1.64607	0.718206
Ethionamide		-0.240491	-0.0888478	-0.403083
Ethosuximide		0.189721	0.68612	-0.224165
Etidronate Disodium		-0.518656	-0.835102	-0.935516
Etodolac		-1.06652	0.6007	-0.64719
Etomidate		-0.868375	0.123773	0.452379
Etomoxir sodium salt hydrate: (+)-Etomoxir sodium salt hydrate		1.44039	-0.110916	-0.811009
Etonogestrel		-1.34322	-0.159073	0.891736
Etoposide		-1.66999	2.66477	0.192284
Everolimus		-0.691276	1.31895	2.49263
Exemestane		0.116869	1.22428	0.211568
Ezetimibe		-0.602201	0.140139	-0.312031
FCCP		-1.90358	-2.06303	-1.66394
FCCP�		-0.195456	2.51776	-0.286572
FIPI hydrochloride hydrate		-1.45379	1.45036	-1.11166
FK-506 monohydrate		-1.7598	1.0318	-0.194078
FK-506		0.344351	0.880276	0.0212959
FK-866		1.06079	-0.977265	0.0420975
FLI-06		-0.239888	0.0928612	-0.271739
FM19G11		-0.225586	0.129453	-0.607114
FPL-64176		0.495492	-0.341324	1.39985
FTI-276 trifluoroacetate salt		0.93299	-1.56086	0.136698
FTY720	MALAT1 hits <-3	-0.881797	-2.43723	-5.8755
Famciclovir		-1.2811	0.13422	-0.57426
Famotidine		0.00418407	-0.0694182	-0.44742
Farnesylthioacetic acid		-0.812405	0.674366	0.269934
Febuxostat		-0.407314	-0.689419	0.589731
Felbamate		-0.596285	0.933039	1.0171
Felodipine		0.179047	-0.367108	0.724502
Fenofibrate		0.0273151	-0.913773	-0.494507
Fenoldopam Mesylate		-1.24163	-1.34603	-1.61666
Fenoprofen Calcium		0.00360454	-2.20222	-0.804931
Fexofenadine�HCl		-1.46767	0.288805	0.113106
Fialuridine		-0.597962	-0.100433	0.751198
Finasteride		0.16576	-1.29052	-0.225112
Fingolimod		-3.10479	-0.340237	-3.21388
Fipronil		-0.0952232	0.389282	0.908539
Flavoxate�HCl		-0.575039	2.50078	-0.0193776
Flecainide Acetate		-0.408485	-0.896917	1.0066
Flecainide acetate		0.303333	-0.15553	-1.33036
Floxuridine		-0.462477	-0.495587	-0.425091
Flubendazol		-0.257644	1.19775	0.604256
Fluconazole		-0.299019	-0.490281	-1.31736
Flucytosine		0.643616	1.25344	-0.521664
Fludarabine Phosphate		-0.316247	1.27118	-0.596078
Fludrocortisone Acetate		1.20461	0.638907	1.96239
Flufenamic acid		0.547591	0.272452	0.061332
Flumazenil		-0.751754	0.0672635	1.22155
Flunarizine�2HCl		-1.39621	-0.849167	1.26785
Flunisolide		0.0934443	-0.452456	-0.865787
Fluocinolone Acetonide		1.01018	0.895439	0.847128
Fluocinonide		-1.02892	1.8262	0.456846
Fluopicolide		1.26708	2.47265	-0.97788
Fluopyram		-0.44775	1.10015	-1.60072
Fluorometholone		-0.505835	0.382319	1.43933
Fluorouracil (5-Fluorouracil)		0.702074	-0.259228	0.369444
Fluorouracil: 5-Fluorouracil		0.591569	-0.105683	-0.0959846
Fluoxetine�HCl		-0.209285	0.359447	0.710898
Fluoxymesterone		-0.817627	0.858007	0.232218
Fluphenazine dihydrochloride		0.0514429	0.567238	0.277978
Fluphenazine di�HCl		0.465103	0.654049	1.00169
Fluphenazine� HCl		-0.0212551	0.0725457	0.9627
Fluprostenol		0.181655	0.358137	0.276396
Flurandrenolide		-0.309384	1.442	0.893498
Flurbiprofen		0.165006	0.239431	0.0688518
Fluspirilene		0.293828	0.437092	1.27596
Flutamide		-0.245306	-0.131739	-0.688927
Fluticasone Propionate		0.295064	2.4833	1.52459
Fluvastatin sodium hydrate		-0.505328	-1.6964	-0.353803
Fluvastatin�Na		-1.17294	-1.87702	0.590974
Fluvoxamine Maleate		1.03735	0.499238	-0.929565
Folpet		0.0681296	1.64357	-1.4561
Fomepizole		0.664931	1.11485	0.179477
Formoterol		0.201434	1.42101	0.371239
Forskolin		0.519003	0.43634	-1.05728
Foscarnet�Na (Sodium Phosphonoformate Tribasic Hexahydrate)		-0.800428	-0.818656	0.0217828
Fosfomycin Calcium		-0.0672702	0.674796	-0.290977
Fosinopril�Na		-0.405013	1.63301	-0.931119
Fosphenytoin�Na Pentahydrate		-0.596151	-0.204872	-0.520381
Fucidin		0.192943	-0.777275	-0.350963
Fulvestrant		1.11962	-0.547561	-0.547535
Fumonisin B1 from Fusarium moniliforme		0.435141	1.89836	-1.33049
Fumonisin B1		0.211849	-0.0194156	-1.51834
Furazolidone		1.68118	-0.47678	1.18256
Furosemide		-0.612325	-0.591981	-2.05333
Furoxan		-2.39003	0.331273	-1.97631
Fusariotoxin		-10.0928	5.23326	4.87638
GDC 0879		-1.1221	0.774948	1.28748
GF 109203X		-1.11102	-6.0192	-0.278018
GF-109203X		-0.19467	-6.21196	-2.74451
GM6001		0.439928	-0.0933986	-0.896365
GSK2606414		-0.304314	-0.732377	-0.915717
GW-5074		0.298849	0.168193	-1.06022
GW-9662		0.147926	-0.843206	-1.21772
GW4869 hydrate		0.457418	1.17267	-1.00609
GW9662		-0.734632	-1.59958	-0.0800022
Gabapentin		0.314921	-0.962913	0.160748
Galantamine�HBr		0.869602	0.859265	-0.489293
Gamma-linolenic acid (18:3 n-6)		0.116765	1.00951	-0.328952
Ganciclovir		0.392645	-0.265516	-0.750227
Gatifloxacin		-0.953927	0.0388432	-0.536889
Gefitinib		-1.3118	-0.496316	-0.29109
Geldanamycin: 17-(Allylamino)-17-demethoxygeldanamycin		-0.805187	1.17581	3.07054
Geldanamycin		-0.10057	-0.243207	0.2537
Gemcitabine�HCl		-0.0937617	1.57834	2.26619
Gemfibrozil		-0.452485	1.18114	-0.281532
Gemifloxacin		-0.237472	0.0980172	-0.0740206
Genipin		-1.28755	0.402292	-1.27617
Genistein		0.154393	0.195433	0.986181
Gentamicin		0.346996	0.49687	-0.364722
Gentamycin Sulfate		-0.302507	0.493948	0.204826
Glafenine		0.384247	-1.33255	-0.399343
Glibenclamide		-0.320038	-0.759653	-1.54595
Glimepiride		0.315147	-0.247464	-0.416831
Gliotoxin		-	-	-
Glipizide		0.528744	0.960076	1.25717
Glucono ?-lactone		-0.495581	0.156729	0.64918
Glucosamine HCl		1.10657	-1.0791	-0.414813
Glucose: 2-Deoxy-D-Glucose		0.674301	-0.906168	-0.336705
Glyburide		-0.178596	0.0846648	-0.00625718
Glycopyrrolate Iodide		-0.267523	-0.161394	-0.340698
Go6850		0.0346887	-5.56747	-1.07954
Go6976		-0.409533	0.0603603	0.71207
Goserelin Acetate		-0.849905	0.314675	0.613479
Gossypol from cotton seeds		-0.581086	0.230432	2.39633
Granisetron�HCl		-0.995635	0.666455	0.638895
Grayanotoxin III		0.668795	0.599722	0.292365
Griseofulvin		0.378689	-0.358282	0.537107
Guanabenz Acetate		0.288541	1.42453	0.593508
Guanfacine�HCl		0.219567	1.23237	-0.00648651
Guanidine�HCl		-0.264085	0.123561	-0.362572
G�6983		-1.12458	-1.54595	-0.197502
H-89		-0.244211	-4.75867	-0.70888
H7		-0.885805	-1.46698	-0.314897
H9		-0.133948	-6.18523	-1.11626
HA-1004		-1.08724	-4.48753	-2.01924
HA1077		-1.14637	-4.51064	-1.44017
HBDDE		0.593098	-3.2567	-0.461122
HNMPA-(AM)3		-4.09654	0.0785034	-0.659375
Halcinonide		0.253293	0.905271	0.0240176
Halobetasol Propionate		0.573326	0.584908	-0.448295
Halopemide		-1.18561	-0.355083	-0.558625
Haloperidol		-0.177807	0.144916	0.455618
Haloperidol�HCl		0.914542	-0.307722	-1.34635
Hexachlorophene		-1.26195	1.74224	0.867302
Hexylresorcinol		-0.221504	-0.396305	0.140616
Hif-2 Inhibitor Axon2034 Compound 2		-0.025809	-0.357874	-0.05055
Hinokitiol		0.417366	-0.802107	-0.442188
Histamine		0.740959	-2.68729	-0.469855
Hoechst 33342�3HCl (BisBenzimide)		-6.53622	-14.6174	-5.03973
Homatropine Methylbromide		-0.998317	-0.572508	-1.07665
Hydralazine�HCl		0.131184	-0.492941	-0.794667
Hydrochlorothiazide		-0.109848	1.02529	-1.71453
Hydrocortisone Acetate		1.41941	2.06394	0.654816
Hydrocortisone		-0.343647	0.996717	1.24058
Hydroflumethiazide		-0.33179	-0.378003	-0.821385
Hydroxocobalamin�HCl		-0.0413908	-0.237153	-0.310793
Hydroxychloroquine Sulfate		-1.11142	-0.0765635	-0.0749672
Hydroxychloroquine		0.845073	-0.772454	0.277965
Hydroxyurea		-0.528389	-0.300204	-0.0765368
Hydroxyzine Dihydrochloride		0.351378	0.202113	1.11486
IB-MECA		-1.23239	2.41384	2.18901
IBMX		0.927654	-0.335855	-1.08439
ICRF-193		-2.95316	-1.77896	-1.32366
IWR-1		-0.715876	-2.34625	0.0850136
Ibandronate�Na Monohydrate		-0.188349	0.608769	-1.75054
Ibuprofen		-0.749205	-0.678579	-0.0730192
Ibutilide Fumarate		0.0965452	-1.95293	-1.13795
Idarubicin�HCl		-	-	-
Idoxuridine		-0.534922	0.528375	-0.671284
Ifosfamide		0.342918	0.439634	-1.1559
Ikarugamycin		-1.00005	-4.05767	-2.50238
Iloperidone		0.034398	-1.10679	-0.486372
Imatinib Mesylate		-1.0554	1.28025	0.597336
Imatinib mesylate		1.10858	0.424455	0.734567
Imipenem		0.110111	1.18236	-0.735449
Imipramine�HCl		0.0168217	-0.348704	0.426805
Imiquimod		0.336283	0.708333	-0.947989
Indapamide		0.674468	-0.708811	-1.61939
Indinavir		-0.670454	-0.728931	-0.924287
Indirubin-3'-monoxime		-0.0876666	1.53289	-2.21613
Indirubin		-0.156314	0.894291	-1.02221
Indomethacin		0.640084	-0.745076	-0.0794772
Inomycin Calcium Salt		1.11989	-3.04847	1.46564
Ionomycin . calcium salt�		-0.337951	4.0857	-1.3555
Ionomycin		-2.37183	-1.73834	0.165306
Ipratropium�Br		1.36019	0.0624035	-0.10764
Iproniazid Phosphate		-0.732252	0.759066	0.40459
Irbesartan		0.550022	-0.262014	-0.394819
Irinotecan (hydrochloride)		-1.08906	0.730217	1.21436
Irinotecan�HCl		-1.03404	1.29015	0.0202036
Isocarboxazid		0.13172	-0.0572495	-0.791485
Isoniazid		-0.0369261	0.15309	-0.860357
Isosorbide Dinitrate		-0.476508	0.54627	-0.944995
Isotretinoin (13-Cis-Retinoic Acid)		-0.689432	-0.893681	-0.557166
Isotretinoin		0.752676	-0.297755	-1.79083
Isradipine		-1.1463	-0.154319	0.294947
Itraconazole		-0.0619407	0.0971936	-1.24168
Ivermectin		0.230388	-0.983872	0.959083
JTE-013		-1.99673	0.705378	-0.306479
Jervine		-0.146252	-1.90114	0.967222
Juglone		0.314666	-1.62421	-0.877328
K145 hydrochloride		-3.51031	0.769002	1.22984
K252A		-1.79674	0.321228	0.291231
KM91104		-0.100746	0.517223	-0.383765
KN-62		-1.1541	0.694133	-1.83644
KN-93		-0.589748	-3.59675	-0.512471
KT-5720		0.302681	0.0667346	-2.2095
KU 0063794		0.656277	0.861829	0.0768442
KU55933�		1.90535	-1.65601	-0.162969
Kanamycin Sulfate		0.200003	-0.179004	-0.497029
Kavain (+/-)		0.204522	-0.571714	-0.0466182
Ketoconazole		0.332888	-0.335969	0.168412
Ketoprofen		-0.617981	-0.0329053	0.483347
Ketorolac Tromethamine		0.370212	-0.330473	-1.07355
Ketotifen . fumarate�		-0.950026	-0.369559	0.0682069
Ketotifen Fumarate		-0.314074	-1.49459	-1.01574
Ki 16425		0.0983205	-0.176403	-0.470937
L-Ascorbic Acid		0.672338	-0.521091	-1.6922
L-NAME		0.606495	1.58222	-1.97471
L-NASPA		-0.987696	-0.293956	-1.24565
L-cis-Diltiazem�HCl		0.209362	-0.22338	-0.0750281
L-erythro-MAPP		-0.353578	-0.212087	0.11137
LCS-1		-9.92123	-5.87803	-5.62754
LDE225		0.564826	-0.374422	0.332989
LFM-A13		0.0132134	-0.0684181	-2.05412
LGK974		1.55263	0.215337	0.011974
LY 215840		0.106897	0.842734	-0.280704
LY-171883		-0.651917	-1.88966	1.10297
LY-294002	MALAT1 hits <-3	0.789785	1.28571	-3.06057
LY-83583		-5.74442	-14.0651	-8.4985
LY294002		-0.538648	-0.196467	-0.495348
Labetalol�HCl		0.183052	-0.00511788	-0.390583
Lacosamide		-0.459922	-0.500163	0.220448
Lactulose		0.314487	0.115562	-0.820815
Lamivudine		0.0223173	-0.605022	-0.383665
Lamotrigine		-0.336838	-0.461356	1.21296
Lansoprazole		-0.13189	-0.558426	0.386835
Lapachone: ?-Lapachone		-	-	-
Lapatinib Ditosylate		0.112805	0.161911	3.01781
Latanoprost		0.223877	0.414344	-0.241093
Latrunculin B from Latruncula magnifica		-8.91517	-9.00731	1.95512
Latrunculin B		-3.5616	-14.9346	0.735198
Lavendustin A		0.411789	-0.940955	-1.07954
Leflunomide		0.617928	0.814528	-0.32462
Lenalidomide		-0.364643	-0.244013	0.0139154
Letrozole		-0.474416	-0.519917	-0.538202
Leucovorin Calcium Pentahydrate		-0.111261	-0.639115	0.100329
Leukotriene B4		-0.213288	-0.902427	0.936269
Leukotriene C4		0.638129	-0.332853	1.50458
Leukotriene D4		-1.32295	0.777863	0.618146
Leukotriene E4		-1.09748	0.264564	1.14399
Leupeptin hemisulfate salt		0.617838	0.257822	-0.161183
Leupeptin		-0.325157	-0.555547	-1.25936
Levalbuterol�HCl		0.705026	0.153763	0.248111
Levetiracetam		-0.202258	1.27679	-0.629874
Levobunolol�HCl		-0.230904	0.148414	-0.401543
Levocarnitine		0.541355	-0.424495	-0.286793
Levocetirizine Dihydrochloride		0.431474	-1.45224	-0.0578154
Levofloxacin�HCl		-0.399586	2.19538	0.277541
Levonorgestrel		0.239721	1.25873	0.256475
Levothyroxine�Na		0.202006	-1.25673	1.43613
Licochalcone A		1.12441	0.157834	0.043022
Lidocaine�HCl�H2O		0.0969625	0.805495	-0.423999
Lincomycin�HCl		0.941976	1.37842	-0.0208088
Lindane		-0.643598	0.323875	0.0378521
Linezolid		0.483377	1.68252	-1.13368
Linoleamide		-1.30054	0.603882	1.05008
Linoleic acid		-0.539566	0.381516	-0.230014
Linolenic acid (18:3 n-3)		-0.430727	0.237292	0.533269
Liothyronine�Na		0.143173	-0.944777	1.11099
Lisinopril Dihydrate		0.696508	0.840705	-1.37619
Lisinopril�2H2O		0.181275	-0.848441	-0.451935
Lithium Chloride		0.959936	-1.22694	-0.86561
Lithocholic acid		-0.455	-0.505429	-0.0450245
Lomustine		-0.299914	0.704415	-0.710948
Loperamide hydrochloride		0.220629	1.59822	-1.31594
Loperamide�HCl		-0.42976	-0.559383	1.01424
Lopinavir		0.469077	-1.32068	1.34982
Loratadine		0.323217	-0.666422	-0.550259
Lorazepam		1.01529	-1.10686	0.647196
Losartan Potassium		0.213704	0.563522	0.205595
Losartan potassium		0.166562	-0.482206	-1.5692
Loteprednol Etabonate		1.33658	0.0309516	1.33397
Lovastatin Sodium Salt		-0.0990454	-1.4372	-0.314178
Lovastatin		-0.327531	-0.585305	-1.29837
Loxapine Succinate		0.346849	-0.814832	-0.110864
Luzindole		0.982676	0.104687	-0.7448
Lycorine hydrochloride		-3.92903	1.49004	7.0765
Lycorine		-3.3605	1.02952	10.163
Lyso-PAF C16		-0.362154	-1.80212	1.44516
Lysophosphatidic acid�Na		-1.18843	-0.293828	1.55989
MBCQ		-0.646422	-0.996083	-1.21585
MCI-186		0.2936	-0.75513	-1.66663
MDL-28170		0.243471	-0.00889394	-0.800195
MG-132		0.548608	-1.80899	1.02512
MG132		-2.86347	-4.62985	5.90824
MI 2 (MALT1 inhibitor)		-2.56248	-0.55232	0.825616
MK-0752		-0.878697	-0.798107	-1.01623
ML 228		-1.9418	1.80086	2.9938
ML 298 hydrochloride		1.20854	-0.873109	-1.06658
ML-7		0.730094	-2.80515	0.806224
ML-9		-1.10215	0.635517	-1.08305
ML211		1.56881	0.541127	-0.425249
ML7		0.033926	1.07025	-2.27913
ML9		-0.383114	0.264053	-2.48202
MRT67307 hydrochloride		-2.71957	0.365167	-1.70581
MRT68921		-2.2898	1.54215	-1.87101
MY-5445		-0.0927555	1.36825	-1.06723
Mafenide�HCl		0.138917	0.354344	0.32265
Malathion		0.119054	0.264379	0.667163
Maltol		0.616476	-0.0326822	-0.567044
Mannitol		-0.685947	-0.465811	0.660778
Manoalide		0.359372	-3.0474	0.053373
Manumycin A		1.21439	-2.24502	1.61762
Maprotiline hydrochloride		1.55159	1.14833	-0.476392
Maprotiline�HCl		0.319429	-1.41937	-0.734072
Maraviroc		0.432952	0.940461	0.801494
Mastoparan		0.543165	-0.731015	-2.48583
Mead acid (20:3 n-9)		0.463139	-0.261288	0.854251
Mead ethanolamide		-0.600002	0.68572	-0.148931
Mebendazole		-3.07815	1.62061	-1.33448
Mechlorethamine�HCl		-0.127025	0.745017	4.02892
Meclizine Dihydrochloride		-0.911649	-0.690363	2.28484
Meclofenamate�Na		1.34287	-0.436038	1.80828
Medroxyprogesterone Acetate		-0.703886	0.517722	-0.606974
Mefenamic Acid		-0.023545	-0.17172	0.551411
Mefenamic acid		-0.175662	-1.01669	0.921637
Mefloquine�HCl		-1.02965	-1.33854	3.93716
Megestrol Acetate		0.162396	1.55045	-0.241071
Melatonin		0.0512963	0.289592	0.140552
Meloxicam		-0.357265	0.125857	-0.216569
Melphalan		0.818016	1.44011	1.2717
Memantine�HCl		-0.929559	-0.593995	-0.532405
Menadione		-0.0188232	1.92508	-1.94751
Mepenzolate Bromide		-0.188283	0.136621	0.469874
Mepivacaine�HCl		-0.217321	-0.153165	1.09271
Meprobamate (Schedule Iv)		-0.753478	0.852218	-0.412136
Mequinol		0.210632	0.73501	-0.158148
Mercaptopurine Hydrate		-0.0294933	0.645905	-0.671553
Mercaptopurine hydrate		-0.994304	0.863449	-1.25742
Meropenem		-0.164947	0.564089	-0.123541
Mesalamine (5-Aminosalicylic Acid)		0.164007	-0.0450329	0.787666
Mesalamine		1.25642	-0.410756	-0.321226
Mesna		-0.801539	-0.0570415	0.508133
Mesoridazine benzenesulfonate		0.230166	1.82565	-1.11855
Mestranol		-1.58992	1.37599	0.00443757
Metaproterenol Hemisulfate (Orciprenaline)		-0.938598	2.36765	-0.3443
Metaraminol Bitartrate		-0.630265	1.1445	0.360571
Metaxalone		-0.470532	0.326753	-0.0766781
Metergoline		-0.176656	0.0579652	0.283866
Metformin�HCl		0.366557	0.416867	0.0968172
Methacholine Chloride		0.386616	-0.0962556	-0.0827974
Methapyrilene�HCl		1.19996	-0.87291	-0.509977
Methazolamide		-0.255589	0.99481	-0.558323
Methenamine Hippurate		-0.0523315	0.275023	0.0215262
Methimazole		-0.460895	-0.824824	-0.992206
Methocarbamol		-0.593128	0.197018	-0.670493
Methoprene acid		-0.752775	0.00667417	0.292205
Methotrexate		0.0438943	0.723114	-0.0692515
Methoxsalen (Xanthotoxin)		-0.410675	-0.0560581	-0.0399342
Methoxyverapimil�HCl		-3.00383	1.95148	1.45603
Methscopolamine Bromide ((?)-Scopolamine Methyl Bromide)		-0.737587	0.650367	-0.40027
Methsuximide		0.326679	-0.0443163	-0.549767
Methyclothiazide		0.529011	0.0908377	0.344005
Methyl Aminolevulinate�HCl		-1.43814	1.35368	-1.05548
Methyladenine: 3-Methyladenine		-1.68263	0.854895	-1.81869
Methyldopa Sesquihydrate (L-?-Methyl-Dopa Sesquihyrate)		0.241898	1.68911	0.219533
Methyldopa		0.703965	-0.789499	-0.751386
Methylergonovine Maleate		-0.257639	0.962076	0.0357185
Methylparaben		0.305544	0.131236	-0.359466
Methylprednisolone		-0.0773859	2.07856	2.02811
Methylsticin		-0.809078	0.040569	-0.969647
Metoclopramide�HCl		-0.369106	-1.14059	0.66163
Metolazone		0.605169	0.482553	0.0717068
Metoprolol Tartrate		0.277253	-0.499657	-0.750646
Metronidazole		1.26094	0.477158	-1.31966
Metyrapone		0.225641	-0.718813	0.189843
Mevastatin		0.784339	-2.05325	-1.0298
Mevinolin (Lovastatin)		0.286242	1.85011	-2.27309
Mevinolin from Aspergillus sp.		0.924554	-0.110511	-0.806124
Mexiletine�HCl		0.0147435	1.93661	-0.315111
Micafungin		-0.967112	0.183543	-0.311502
Miconazole nitrate salt: (�)-Miconazole nitrate salt		-0.741739	-1.30795	-1.06105
Miconazole nitrate		-0.57697	0.0376832	1.41997
Miconazole		-0.276439	0.724746	-0.41167
Midodrine�HCl		0.761787	0.499935	-0.425028
Mifepristone		-0.72326	-1.75301	-2.24644
Miglitol		-0.457897	0.679693	-0.602886
Miglustat (N-Butyldeoxynojirimycin�HCl)		0.412906	0.0384901	-0.33739
Milnacipran�HCl		-0.370949	0.0159188	-0.145618
Milrinone		-0.183466	-0.888374	-0.618451
Minocycline		-0.150313	-0.228579	1.03042
Minocycline�HCl		1.36163	-1.46302	0.549639
Minoxidil sulfate		-0.12758	0.2289	0.517298
Minoxidil		0.407424	0.404104	-0.051583
Mirtazapine		0.383774	-0.720489	-0.43817
Misoprostol		0.593276	1.5799	-2.25889
Mitomycin C from Streptomyces caespitosus		0.712434	0.895514	-0.109555
Mitomycin C		-0.569241	2.19903	0.47479
Mitotane		-0.735394	-0.12382	0.372573
Mitoxantrone di�HCl		-9.30324	-17.6831	-6.02013
Mitoxantrone�HCl		-8.21069	-17.9956	-4.62308
MnTBAP chloride		0.879725	-0.275254	-0.439357
Modafinil (Schedule Iv)		-0.00789281	-0.734102	-0.506991
Moexipril�HCl		-0.0857062	-0.0875877	0.382848
Mometasone Furoate		0.428856	1.54221	0.298872
Monastrol		0.338079	1.08222	-2.85704
Monensin sodium salt		-0.411169	1.55054	0.870679
Monensin sodium		-0.0544659	0.660593	-1.85854
Monocrotaline		1.07767	-0.0843727	-0.946563
Montelukast�Na		-0.31481	-0.544657	0.559161
Moxifloxacin�HCl		-0.0710117	-0.489861	-0.818814
Mupirocin		-1.06842	0.0310686	-0.317371
Mycophenolate Mofetil		-0.0821474	0.166198	-1.30786
Mycophenolic Acid		-0.23709	-0.549268	0.378698
Mycophenolic acid		-1.56566	-1.56081	-0.749032
Myriocin from Mycelia sterilia		0.184626	0.662525	0.246008
N-Acetyl-S-geranyl-L-cysteine		0.482879	1.11415	0.400251
N-Acetyl-leukotriene E4		-0.399352	-1.21803	0.694232
N-Phenylanthranilic acid		-2.92972	1.15224	1.65913
N-acetyl-S-geranylgeranyl-L-Cysteine		0.780663	2.31479	0.330656
N-arachidonoylglycine		-0.303772	-0.204087	0.834043
N-linoleoylglycine		-0.204322	-0.830509	0.252659
N9-Isopropylolomoucine		-0.00466926	0.336255	-1.86632
NPPB		-0.181368	0.849543	1.09417
NS-1619		-0.123482	-0.570638	0.418088
NS-398		-0.516019	0.667128	1.15626
NSC 95397		-	-	-
NSC-95397		-3.79148	-4.97366	5.54743
NVP-BEZ235		0.425727	0.752691	0.28294
Nabumetone		0.192361	-0.380899	1.22983
Nadolol		0.051414	0.335832	-1.31957
Nafamostat mesylate		-2.43164	1.46397	0.512985
Nafcillin�Na		-1.08497	0.365175	-0.473654
Naftifine�HCl		-0.367169	0.00314456	-0.253221
Nalbuphine�HCl Dihydrate		-1.43423	0.924485	-0.361067
Naloxone�HCl		0.77117	-0.58502	-0.842188
Naltrexone�HCl		-0.142236	-1.55557	-0.831615
NapSul-Ile-Trp-CHO		1.26614	-1.27813	-0.674068
Naphazoline�HCl		0.218715	0.611159	0.287683
Naproxen		0.252821	-1.29451	0.981522
Naratriptan�HCl		-0.49976	0.0738823	-0.520023
Natamycin		0.635723	-0.0271968	0.00726106
Nateglinide		-0.477239	-0.178776	0.842514
Nebivolol�HCl		-0.324713	-0.627571	1.08063
Nefazodone�HCl		-0.206423	-0.588014	-0.0538918
Nelarabine		-0.434018	-0.283034	0.301203
Nelfinavir Mesylate		0.126861	-1.20008	-0.0642366
Neomycin Sulfate		-0.871231	-0.3177	0.429598
Nepafenac		-0.052709	-0.443891	-0.520415
Nevirapine		-0.107754	0.207475	-0.505352
Niacin		-0.0948499	1.18858	-1.1068
Nicardipine�HCl		0.240942	0.0659776	0.699983
Niclosamide	MALAT1 hits <-3	-2.62344	0.178326	-5.90642
Nicotine		-0.476814	0.115229	-0.853754
Nifedipine		-0.605283	0.642032	0.402438
Niflumic acid		1.21253	0.74288	-0.0939082
Nigericin		0.651973	0.286033	1.64309
Niguldipine hydrochloride: (S)-(+)-Niguldipine hydrochloride		-9.05604	-3.28733	0.520943
Niguldipine		0.440344	-0.504945	2.46002
Nilotinib		-0.23956	0.440245	-0.228268
Nilutamide		-0.267286	0.757922	-0.808759
Nimesulide		-0.844412	-0.162369	-0.73062
Nimodipine		0.889215	-0.0715011	0.0484718
Nisoldipine		0.983757	0.156027	0.764788
Nitazoxanide		-0.220122	-0.0603829	0.0129563
Nitisinone		-0.815416	0.140906	-0.160166
Nitrendipine		1.00645	0.788647	-1.16771
Nitrofurantoin		0.00214089	0.738668	0.422441
Nizatidine		0.26363	0.336325	-0.870322
Nocodazole		-3.64893	2.41904	-0.638029
Norclomipramine�HCl		-0.443374	-0.964964	1.16076
Nordihydroguaiaretic acid		-1.22928	-0.883308	2.36625
Norepinephrine Bitartrate Monohydrate		0.284795	0.682346	0.016841
Norepinephrine: (?)-Norepinephrine		0.13521	3.64032	-2.31525
Norethindrone		0.138252	1.91924	0.639149
Norfloxacin		0.929581	1.00784	0.376456
Nortriptyline�HCl		0.248821	1.22409	1.01117
Nystatin		-0.208966	0.524061	-0.0446729
OBAA		0.775251	1.561	0.861563
OX-314		-0.235425	-0.266928	0.436681
Ofloxacin		-0.566796	1.23458	-0.510249
Okadaic acid		-	-	-
Olanzapine		-0.293504	-0.172416	1.43114
Oligomycin A		0.148684	1.20909	-1.37599
Olmesartan		0.195486	2.17751	-0.894515
Olomoucine		-0.157849	1.09236	-1.96988
Olopatadine		-0.601394	1.28497	-0.76129
Olsalazine�Na		-1.27726	0.350915	0.421744
Omeprazole		-0.664463	0.784502	0.765447
Ondansetron		0.0277267	-1.66629	-0.471128
Orlistat (Tetrahydrolipstatin)		-0.62235	0.21215	-0.315489
Orphenadrine Citrate		-1.30758	-0.813959	0.300035
Oseltamivir Phosphate		-0.617384	-0.387685	-0.873392
Ouabain		-2.68433	2.37063	2.27983
Oxacillin sodium salt monohydrate		0.0420364	0.892736	1.39753
Oxaliplatin		-0.151482	-0.347878	-0.628489
Oxaprozin		-1.71712	-0.0885686	-0.510304
Oxazepam		-1.18717	-0.302815	-0.235387
Oxcarbazepine		0.119265	0.081585	0.499484
Oxiconazole Nitrate		0.571353	0.0351061	0.773362
Oxozeaenol: 5Z-7-Oxozeaenol		-1.90254	0.685314	2.84888
Oxtriphylline		-1.53032	0.61885	-0.933686
Oxybutynin Chloride		-1.30655	0.224436	-0.437963
Oxytetracycline�HCl		0.162154	-0.684168	-0.287619
PAF C16		0.238849	-0.275634	-0.168014
PAF C18:1		-0.584832	0.186	-0.101034
PAF C18		-0.473651	0.0507007	0.00179484
PAFC 16 (?-Acetyl-y-O-hexadecyl-L-a-phosphatidylcholine hydrate)		0.0882174	-0.925577	0.757451
PCA 4248		0.340718	-0.795513	-0.957664
PCO-400		0.318582	-0.439394	-0.375567
PD 150606		-1.84021	-0.527808	1.12988
PD 151746		-0.291598	-2.38931	0.71639
PD 98059		-0.727557	0.523084	-0.178246
PD-98059		-0.689913	-1.216	0.300223
PD184352		-0.208107	0.0288705	-0.160644
PD98059		-2.15277	1.79411	1.49326
PDGFR Tyrosine Kinase Inhibitor V		-0.25104	2.79653	-0.824364
PF-04217903		-0.692089	2.2995	-1.22879
PF-04449913		-0.633801	-0.769721	-0.295361
PF-3084014		2.5635	-1.32047	-0.157689
PF-543		-0.0923257	-0.266275	-1.71702
PI 103 hydrochloride		1.62903	2.97004	-1.83187
PI-103		1.28494	0.198933	-1.86176
PKC-412 (Midostaurin)		-0.226353	-3.95308	0.389752
PMSF		1.03328	0.0451837	0.0399458
PP1		1.18798	-1.92912	-2.28886
PP242 hydrate		-1.0736	-0.262524	0.0212188
PP2		0.708406	-1.5781	-2.69107
PRIMA-1		0.568554	-4.56291	-0.503334
PTC-209		-2.28391	1.30277	4.09491
PX 12		-0.451418	0.271472	-0.900518
Paclitaxel (Taxol)		-4.16604	1.8315	-0.582748
Paclitaxel		-2.63709	1.28884	-0.749652
Paliperidone		0.570443	-0.833522	0.851141
Palmitylethanolamide		-0.089223	0.513373	-0.509586
Palonosetron�HCl		0.471423	0.753534	0.371644
Pamidronate Disodium Pentahydrate (Pamidronic Acid)		0.523175	-0.0936806	-0.734258
Pancuronium�2Br		0.271521	1.0863	0.12151
Pantoprazole		-0.310247	1.67751	1.09428
Papaverine�HCl		0.871087	-0.632471	-0.269157
Paromomycin Sulfate		0.0405985	-0.305601	0.051302
Paroxetine hydrochloride hemihydrate		-0.808725	-0.444093	0.979368
Paroxetine�HCl		-0.0464861	0.676249	1.58024
Parthenolide		-3.3405	-2.48071	10.1885
Paxilline		1.43655	-1.08188	0.344124
Pazopanib�HCl		-0.0601606	-0.525508	0.577411
Pemetrexed Disodium		-0.5655	0.206168	0.0713723
Pemirolast Potassium		-0.761143	0.258481	-0.396667
Penciclovir		-0.155411	0.821119	1.37572
Pencycuron		1.54164	1.09668	-0.114041
Penicillamine (D-Penicillamine)		0.739561	0.0112369	0.683833
Penicillin G Potassium (Benzylpenicillin)		1.08143	0.239588	-0.0726623
Penicillin V Potassium Salt		1.14731	-0.204472	0.0174914
Penicillin V Potassium		-0.676487	0.535373	-1.42893
Penitrem A		-0.308364	-1.42861	-1.17711
Pentamidine Isethionate		-0.510644	-0.695292	-0.144208
Pentostatin		0.586346	0.103003	-0.805045
Pentoxifylline		0.674591	0.443285	0.230449
Pepstatin		1.29494	-0.25376	0.396063
Perhexiline maleate salt	MALAT1 hits <-3	-0.947149	4.12245	-3.63805
Perindopril Erbumine		-1.4224	0.593496	1.69293
Permethrin		0.484256	0.416754	1.51338
Perphenazine		-0.371096	0.0645843	1.62785
Phenamil		0.85916	1.21215	-1.13518
Phenelzine Sulfate		0.336495	0.288472	1.5205
Phenformin hydrochloride		-0.166723	0.969065	-0.626026
Phenformin�HCl		0.988057	-1.09482	-1.66754
Phenoxybenzamine		0.113028	-0.860801	0.360057
Phenoxybenzamine�HCl		0.579968	0.0695396	0.373201
Phentolamine hydrochloride		0.226193	-0.803113	0.687048
Phentolamine mesylate		0.0958266	-0.263742	-0.843573
Phentolamine		0.558872	0.0384936	0.573247
Phentolamine�HCl		0.0584195	0.634476	1.2691
Phenylbutazone		0.42243	-0.166318	-1.49391
Phenylephrine		-0.740149	0.149398	1.33775
Phenytoin		-0.208444	0.0112105	0.722737
Phorbol 12-myristate 13-acetate		-0.438867	3.92753	1.80482
Phosphatase Inhibitor Cocktail 1		-0.674149	1.19993	-0.381196
Phytonadione		0.379196	-0.063138	0.732136
Piceatannol		-0.0132523	-0.475335	-1.7066
Pifithrin-?		0.730036	1.85092	-0.300822
Pifithrin-�		-0.79772	0.742883	-0.688447
Pilocarpine�HCl		0.989553	-0.804684	-0.179056
Pimecrolimus		0.660191	0.11954	1.32803
Pimozide		0.329369	0.203214	-0.533911
Pinacidil		-2.35887	0.46254	2.59833
Pindolol		0.364333	-0.523007	-0.363946
Pioglitazone�HCl		0.0307938	0.490648	-0.493999
Piperacillin		1.25794	1.26327	-0.270033
Piroxicam		0.380741	-0.667419	-1.12564
Pitavastatin Calcium		-0.666306	-1.44407	1.41088
Plumbagin		1.52946	0.480619	-0.852052
Podofilox		-2.35554	2.32005	-0.321835
Posaconazole		-0.000263631	-0.205718	-0.761134
Pralidoxime Chloride		0.0424713	0.149969	0.0113803
Pramipexole Dihydrochloride Monohydrate		0.787612	0.150497	-0.689626
Prasugrel		-0.0809018	0.368348	-0.635213
Pravastatin�Na		-0.630274	-0.855554	-1.34969
Praziquantel		0.700178	-0.708869	-0.427708
Prazocin		0.53316	-0.547987	-0.260863
Prazosin hydrochloride		0.511225	0.822788	-0.417469
Prazosin�HCl		-0.0626298	1.44787	0.605517
Prednisolone		0.623124	0.927168	-0.657137
Prednisone		-0.275824	-0.997294	-0.916227
Pregabalin		0.726188	1.25856	0.495939
Pregnenolone-16?-carbonitrile		-0.236419	-2.35663	-1.82383
Prilocaine�HCl		-0.0843355	1.34899	-0.948464
Primaquine Phosphate		-0.145206	-0.165144	-0.68358
Primaquine bisphosphate		-1.23266	3.00554	-1.83125
Primidone		0.217736	-1.02057	0.624666
Probenecid		-0.730368	0.156067	0.389299
Procainamide		-0.0145848	0.33288	0.718264
Procainamide�HCl		0.801481	-0.514458	0.563152
Procarbazine�HCl		-0.607056	-0.280727	-1.16862
Prochloperazine dimaleate		-0.720773	1.72495	0.443173
Progesterone		0.400791	0.382012	-1.25856
Promethazine�HCl		0.444335	-0.840667	0.882517
Propafenone		-0.0763449	-0.408025	0.477772
Propafenone�HCl		-0.193072	0.327745	1.17999
Proparacaine�HCl		-0.433984	-0.942886	0.714459
Propidium iodide		1.79511	0.803474	-0.925238
Propofol		0.396108	0.284494	0.19612
Propranolol�HCl		-0.464333	-0.367257	-1.65308
Propyl gallate		0.0749786	-0.419547	1.38986
Propylthiouracil		0.734514	0.851631	-0.216515
Prostaglandin D2		-0.144052	-0.562521	0.0926817
Prostaglandin E1		0.229171	-0.348039	-0.194613
Prostaglandin E2		1.41437	0.323214	-0.671797
Prostaglandin F1a		-0.0151187	0.428035	-0.894044
Prostaglandin A1		-0.217771	-0.361948	-0.501508
Prostaglandin A2		-0.218358	-0.500168	-0.504713
Prostaglandin B1		1.38406	-0.805431	-0.0839594
Prostaglandin B2		1.3705	-0.365266	0.127886
Prostaglandin F2a		-0.839346	1.16373	-0.996189
Prostaglandin I2		-0.727604	0.357088	-0.612885
Prostaglandin J2		0.0930716	0.0924502	-0.998744
Protease Inhibitor Cocktail		0.298581	2.80236	1.47946
Protriptyline�HCl		-0.0975931	-0.391656	-0.832594
Puromycin.2HCl		-7.38862	0.335015	2.02818
Puromycin�2HCl		-4.8855	-7.12646	1.79581
Pyrazinamide		0.288992	-0.911015	-1.58282
Pyridostigmine Bromide		0.44969	-0.291359	0.356091
Pyrimethamine		0.643393	1.75458	-0.303917
QNZ		-0.0143153	-0.653026	0.221388
QX-314		1.24906	-0.0241453	-0.30002
QX-314�		0.258467	1.04981	0.226573
Quercetin		-2.08616	1.38384	-1.22059
Quercetin�2H2O		-0.680226	2.10527	-0.883121
Quetiapine Fumarate		0.149067	-0.310135	-0.379614
Quetiapine hemifumarate salt		-1.00605	1.9811	-0.474471
Quinacrine�2HCl�2H2O		-2.71675	-5.31275	-2.19948
Quinapril�HCl		-0.260303	-0.979021	-0.130102
Quinidine�HCl�H2O		0.00753115	0.464247	-0.649056
Quinine HCl�2H2O		1.13818	-0.650669	0.0754013
Quinine�HCl�2H2O		0.458485	0.878263	-0.515084
Quinine�HCl�H2O		0.560584	-0.120252	0.778458
R(+)-IAA-94		0.357749	-0.406855	0.801263
REV-5901		-0.367588	0.529467	-0.109125
RG-14620		-0.319947	0.386716	-0.584874
RHC 80267		0.866203	2.36421	-1.01161
RHC-80267		0.535786	-1.41467	-1.36406
RK-682		0.247122	-0.609653	-1.76303
RO4929097		0.372103	-1.25748	-1.45685
RWJ-60475-(AM)3		0.940391	-0.308105	-0.769871
Rabeprazole�Na		0.910359	-0.804118	0.701292
Raloxifene hydrochloride		1.28535	2.59578	-0.737913
Raloxifene�HCl		-0.215006	0.304796	0.933172
Raltegravir		-0.29777	0.990458	-2.09884
Ramelteon		-0.354115	-0.764162	-1.04161
Ramipril		-0.209144	1.11767	-1.61714
Ranitidine�HCl		0.17571	0.684383	1.00008
Ranolazine dihydrochloride		1.20851	1.67694	-2.53159
Ranolazine�2HCl		0.151322	0.645707	-0.960716
Rapamycin from Streptomyces hygroscopicus		-0.331606	-0.0551224	2.22672
Rapamycin		1.56391	0.128148	1.16051
Rasagiline Mesylate		-0.106532	0.675708	0.20322
Regadenoson		1.29763	0.684659	-1.63095
Regorafenib (BAY 73-4506)		0.876562	-0.668815	-0.123466
Regorafenib BAY 734506		-0.766974	-2.38885	0.488591
Repaglinide		0.716182	1.02594	-0.348624
Reserpine		1.03226	0.377908	-0.115796
Resveratrol		0.107514	-0.231087	-0.679292
Ribavirin		0.132423	0.000319857	-0.393734
Rifabutin		0.397323	0.0679764	-0.00158598
Rifampicin		0.708935	0.345209	1.10652
Rifampin (Rifampicin)		0.0845191	0.492134	0.792599
Rifamycin SV sodium salt		-0.341046	0.0493602	-0.605319
Rifapentine		-0.198949	0.3672	-0.446859
Rifaximin		0.220336	2.13503	-0.612604
Rilmenidine		1.67328	-0.629646	-0.229576
Riluzole�HCl		0.890973	0.477255	0.671338
Rimantadine�HCl		-0.938715	0.455145	-1.27481
Risperidone		0.570549	0.22615	-0.681126
Risredonic Acid		0.423383	-0.0879312	-1.4269
Ritonavir		0.113603	-0.197543	-0.30748
Rivastigmine Tartrate		-0.030724	-0.402578	-0.279766
Rizatriptan Benzoate		1.78949	0.159969	-0.660516
Ro 20-1724		0.22602	1.30349	-1.02204
Ro 31-8220 methanesulfonate salt		-1.74594	3.96248	-2.37545
Ro 31-8220		-9.1698	-18.3717	-4.25985
Rockout		1.18185	1.94943	-1.98211
Rocuronium Bromide		1.13536	0.260226	-0.873668
Rolipram		0.245067	0.529693	-0.593854
Ropinirole�HCl		0.888239	1.17502	-0.318179
Ropivacaine�HCl Monohydrate		0.684219	0.429959	-0.324956
Roscovitine		-0.655877	0.923401	-1.67358
Rosiglitazone		1.01485	-0.0615256	1.66122
Rosuvastatin Calcium		-1.16551	-1.82536	-1.42213
Rosuvastatin calcium		-0.0282328	-1.86443	-0.374707
Rotenone		-2.81796	0.621901	-0.365798
Rottlerin		0.152159	-0.338716	-1.36586
Rufinamide		0.984878	0.422053	-0.462723
Ryanodine (high purity)�		-0.572932	0.127527	0.000239792
Ryanodine		1.00149	0.585564	-0.899795
S-farnesyl-L-cysteine		-0.578377	0.220704	-0.73639
SAHA		0.863512	-8.75905	1.80647
SAR405		-0.175317	-2.45926	0.807068
SB 202190		1.0984	-0.965379	-0.672042
SB 203580		1.00491	-0.985518	0.567583
SB 590885		-0.832525	2.61449	1.78413
SB-216763		-0.031051	-0.443699	0.112225
SB-415286		-0.894459	-1.24194	-1.18266
SB-431542		0.125113	0.741805	0.299735
SB202190		0.119875	0.130695	-1.02833
SBI-0206965		-2.3213	1.95984	-0.900934
SDZ-201106		0.459625	0.0924446	-0.269004
SKF-96365		0.665105	-0.493145	-0.275635
SKI-II		-1.98939	1.1653	-1.04114
SMER28		-1.18516	2.05752	-1.42556
SP-600125		-0.254646	2.7178	-1.29177
SP600125		-1.53865	-0.311903	-0.581996
SQ-29548		0.408008	0.0851323	0.246348
SQ22536		1.04835	1.84403	-1.60463
STF-62247		-0.257886	-0.07315	-0.461431
STO-609-acetic acid		-0.505714	1.05175	-1.58593
SU-4312		0.129011	0.306384	-0.650263
SU11652		1.90406	-0.473041	-0.183357
Salbutamol Hemisulfate		0.721481	1.6951	0.784914
Salinomycin	MALAT1 hits <-3	-0.531668	-1.25022	-5.92653
Salmeterol		0.767847	2.02578	-0.00989041
Salvinorin A		-0.958949	0.127739	0.64498
Saquinavir Mesylate		-0.182479	-1.07415	-0.321028
Scopolamine hydrochloride: (?)-Scopolamine hydrochloride		-0.0526336	-0.363682	-0.864577
Scopolamine�HBr		0.546052	0.1198	-0.891261
Selegiline�HCl		0.0812295	0.871078	-0.635678
Selumetinib (AZD6244)	MALAT1 hits <-3	-1.67885	-0.541567	-6.4671
Seneciophylline		0.667676	-0.17574	-0.289841
Serotonin		-0.0577566	0.926944	-1.3079
Sertaconazole		0.261747	-0.274156	1.16084
Sertraline hydrochloride		-0.818753	1.12394	-1.48131
Sertraline�HCl		0.398755	2.1889	-0.692308
Shikonin		-1.01733	0.873168	-0.0728256
Siguazodan		0.637462	1.26695	-0.725668
Sildenafil Citrate		0.802465	-0.289004	2.39346
Silver Sulfadiazine		0.221273	1.66281	-1.07089
Simvastatin		-0.00373125	-0.691279	-0.474048
Siramesine fumarate salt		0.929613	2.7793	-1.76458
Sirolimus (Rapamycin)		-1.12119	2.11308	3.21131
Sitagliptin Phosphate		-0.503749	1.94525	-0.472357
Sodium Phenylbutyrate		-0.0236196	-0.411911	1.09655
Sodium Valproate		-0.22543	0.324377	-0.235863
Sorafenib Tosylate		1.0212	0.873188	-1.07877
Sorafenib tosylate		-0.322306	-0.460011	-1.48378
Sorafenib		-0.0277727	0.354622	-0.771804
Sorbic acid		0.784947	-0.363247	0.451335
Sorbitol		0.342101	-0.0141566	0.670133
Sotalol�HCl		0.479715	-1.65407	-1.01892
Spautin-1		0.361906	-0.386203	-1.15637
Spectinomycin di�HCl pentahydrate		-0.546305	-0.908645	-0.788399
Spectinomycin�HCl Pentahydrate		-0.195716	0.336408	0.179159
Spermidine		-0.225746	0.485103	-0.667586
Sphingosine		0.990634	-0.492914	-0.11776
Spironolactone		0.291859	0.440942	-1.79551
Splitomycin		0.693337	-0.537234	-0.762096
Staurosporine		-	-	-
Staurosporine�		-	-	-
Stavudine		0.691393	1.34502	-0.128876
Sterigmatocystin		1.15926	0.997696	-0.720646
Streptomycin Sulfate		0.805496	-0.200405	-0.687034
Streptozocin		0.590172	0.645086	-0.690932
Succinylcholine Chloride�2H2O	MALAT1 hits <-3	-0.220508	0.118524	-3.13076
Sucrose		1.49892	-0.655432	0.225319
Sulconazole Nitrate		0.228793	-0.299947	0.432806
Sulfacetamide�Na		-0.748003	0.0882523	-0.354052
Sulfadiazine		0.514849	-1.02202	-0.445607
Sulfamethizole		0.494888	0.356741	-1.46702
Sulfamethoxazole		-0.230963	-0.113633	0.170489
Sulfanilamide		-0.504391	0.0163545	-0.469727
Sulfasalazine		-0.796475	0.900802	-1.12468
Sulindac		-0.0700254	-0.20124	-0.158795
Sulpiride		0.691086	-0.989473	-1.43089
Sumatriptan Succinate		-0.257426	0.945984	0.11867
Sunitinib Malate		-3.01981	-0.591586	-0.12256
Sunitinib malate		-0.387858	0.342676	-1.0943
Suramin sodium salt		-0.987152	-0.451118	-0.553256
Suramin�6Na		1.936	-1.08109	-0.91187
TIC10 angular		-0.404158	-0.880018	0.641216
TMB-8		-1.19778	1.96223	1.01678
TOFA		-0.529524	-0.624061	1.88179
TPEN		-8.24684	-22.6533	-5.16149
TRIM		-1.47934	2.72326	0.34676
TTFA		0.834632	-0.283128	0.709422
TTNPB		-0.373813	-0.284192	-0.411521
Tacrine�HCl		-1.02408	-0.558814	0.424567
Tacrin�HCl		0.790898	0.219539	-0.815914
Tacrolimus (Fk506)		-0.497836	1.3519	-1.22067
Tadalafil		-0.700381	0.242981	-0.53042
Tamoxifen Citrate		0.359004	-1.03065	0.494508
Tamoxifen citrate		-0.41521	-0.741716	1.25705
Tamoxifen		-0.0626764	0.570989	0.0110687
Tamsulosin�HCl		0.0181898	0.00378808	-1.93687
Tanshinone IIA		-0.142269	-1.03795	-0.607458
Tartaric acid		1.02378	0.299251	0.735964
Tauroursodeoxy cholic acid dihydrate		0.209542	0.307168	0.573559
Taxol = Paclitaxel		-2.60624	1.11607	-0.637838
Taxol BioChemica		-5.14995	2.7338	-1.30043
Tazarotene		0.022454	0.127376	-0.935585
Telbivudine		-0.75711	-0.087316	-0.191888
Telithromycin		-1.10605	-0.465774	-0.300081
Telmisartan		0.343578	-1.21239	-0.0852842
Temazepam		0.221511	-0.0962306	-0.81389
Temozolomide		0.206852	-0.336743	-0.996594
Temsirolimus		0.576418	2.23254	1.29008
Teniposide		-2.82885	-2.8942	1.82626
Tenofovir		0.80166	1.09662	-0.113985
Terazosin�HCl		0.393463	-1.85811	-0.487697
Terbinafine�HCl		0.507379	-0.0347418	0.112101
Terbutaline Hemisulfate		1.49303	1.62945	0.464608
Terconazole		0.169716	2.15217	0.720596
Testosterone Enanthate		-0.174396	2.1739	0.416458
Tetrabenazine		0.689394	1.243	0.505795
Tetracycline		0.0456257	-0.600239	-0.624868
Tetrahydrocannabinol-7-oic acid		0.384983	-0.0141779	-0.0491558
Tetrahydrozoline�HCl		0.0581823	0.98874	-0.177412
Tetrandine		1.11177	-0.721477	-0.0671047
Thalidomide		0.328236	-0.461835	-1.01499
Thapsigargin		-1.55162	1.55751	2.52651
Theophylline		0.244859	0.21746	0.255199
Thiabendazole		0.316611	0.49248	-0.59393
Thiobenzamide		-0.0413763	-0.102119	-1.8036
Thiocitrulline [L-Thiocitrulline]		0.415629	-1.49218	-2.4068
Thioguanine (6-Thioguanine)	MALAT1 hits <-3	-0.26485	2.94931	-3.60622
Thiophanate-methyl		-0.391072	2.41054	-1.14026
Thioridazine hydrochloride		0.720183	0.00458439	-0.700594
Thioridazine�HCl		-0.0606323	-0.232974	1.30746
Thiorphan		-0.172342	2.8133	0.675965
Thiotepa		0.610703	0.520436	0.161617
Tiagabine�HCl		1.09033	0.0332871	1.20957
Ticlopidine�HCl		-1.38762	0.59223	-1.10463
Tigecycline		0.688532	0.732852	0.954542
Tiludronate Disodium		1.66198	0.182991	1.16647
Timosaponin A-III		0.238822	1.1568	-0.716212
Timosaponin AIIII		-1.17743	0.654951	0.0429021
Tinidazole		-1.65101	-1.17749	-0.751297
Tiopronin		0.258177	0.409605	1.65218
Tiotropium Bromide		-0.565178	-1.89271	-1.30071
Tirofiban�HCl		0.264206	0.254195	0.916215
Tizanidine�HCl		0.891041	1.15327	-0.0216151
Tobramycin		-0.0705093	-1.80044	-1.10262
Tolazamide		-0.273522	0.283675	-0.0859159
Tolbutamide		0.690332	-0.341751	-0.39465
Tolcapone		-0.498229	0.0244668	-1.19273
Tolmetin sodium dihydrate		0.866365	-0.378031	-0.389242
Tolmetin sodium salt dihydrate		-0.0227643	-1.77077	0.620286
Tolterodine L-tartrate		-0.249483	-0.0308295	-0.930015
Tolterodine Tartrate		0.853795	0.0541973	0.344651
Tolvaptan		0.182707	-0.153557	0.0389408
Topiramate		0.719665	0.936781	0.117135
Topotecan�HCl		-4.07202	-0.0347397	-2.82852
Toremifene Base		-0.226735	-0.719583	-0.31327
Toremifene citrate salt		-0.551891	2.68352	-0.629398
Torin 1		0.787223	-0.216453	-1.12708
Torsemide		0.993545	0.35832	1.32679
Tosyl-Phe-CMK (TPCK)		-3.2359	1.69908	2.73689
Tramadol�HCl		-1.01543	-0.728567	-0.184084
Trandolapril		-0.645064	0.181441	0.557053
Tranexamic Acid		-0.887856	0.678019	-0.41197
Tranylcypromine Hemisulfate		0.25158	0.565675	-0.0376587
Travoprost		-0.812293	-1.05286	2.32446
Trazodone�HCl		1.00334	-0.0810711	1.67019
Trehalose		0.203352	0.193157	-1.08027
Trequinsin		0.483459	-0.598868	-1.60217
Tretinoin		1.07814	-1.9779	-0.633152
Triamcinolone Acetonide		0.17452	1.18229	2.53706
Triamterene		0.0684212	0.743556	0.849921
Triazolam		-0.276999	0.09086	0.268089
Trichostatin A		0.635635	-9.06304	3.7219
Trichostatin-A		-2.22021	-12.8549	0.793973
Triciribine hydrate		0.423527	5.86599	-1.98844
Trientine Dihydrochloride		-0.59348	0.562906	0.0546019
Trifluoperazine dihydrochloride		-1.26004	0.1044	1.37945
Trifluoperazine		-1.97001	2.08021	1.60546
Trifluoperazine� HCl		0.227263	0.272399	1.69526
Trifluoperazine�2HCl		0.658674	-0.245249	-0.890768
Triflupromazine hydrochloride		-0.496585	-0.129644	0.273488
Triflupromazine�HCl		0.29085	-0.358228	-1.12471
Trihexyphenidyl�HCl		-0.45223	-0.443374	0.165942
Trimethadione		-1.16877	0.155186	0.494806
Trimethobenzamide�HCl		-1.10074	-0.187296	0.229044
Trimethoprim		-0.949994	-0.592601	-0.160016
Trimipramine Maleate		-0.140279	-0.640356	-0.761367
Triptolide		-6.79629	-21.5533	-7.26889
Triptorelin Acetate		0.525	-0.209408	-1.13735
Troglitazone		-0.125027	-0.330735	0.426971
Tropicamide		0.486877	0.893606	0.299055
Trospium Chloride		-0.214193	-0.584521	-0.304924
Trovafloxacin mesylate		-0.169002	3.08996	-0.772031
Tunicamycin from Streptomyces sp.		-1.20811	1.69307	0.068242
Tunicamycin		-1.09114	2.66296	0.708087
Tyrphostin 1		-0.159205	-1.76207	-1.72823
Tyrphostin 9	MALAT1 hits <-3	-1.06969	1.2038	-3.90812
Tyrphostin AG 1478		-0.223653	0.760362	0.00369479
Tyrphostin AG 879		-0.987641	1.07407	0.453632
Tyrphostin AG-126		-0.176665	-0.7258	-0.903175
Tyrphostin AG-825		0.276409	1.70855	-0.243543
Tyrphostin AG1288		-0.136439	-2.04221	0.0609
Tyrphostin-8		1.34178	-0.702687	-0.389822
U-0126		-0.0841337	0.241714	2.17603
U-37883A		0.714537	0.563817	-0.553887
U-46619		-2.83806	0.350334	-2.94027
U-50488		0.381059	0.217005	-0.427455
U-74389G		0.693707	-0.76781	0.359176
U-75302		-1.13032	-0.275404	-1.02241
U73122		-2.52883	1.07979	-0.795019
Ursodiol		0.109721	0.367656	-0.562114
VU 0155069		-0.40428	0.922331	0.864844
VU 0364739 hydrochloride		-1.13627	0.317999	-1.49212
VU0359595		-0.100744	0.310512	-0.293099
Valacyclovir�HCl		0.900081	-1.81533	-0.348711
Valganciclovir�HCl		-0.387414	-0.488906	-0.522049
Valinomycin		-0.195869	1.96006	-0.197205
Valproate�Na		-0.165135	-0.585552	-0.0230814
Valproic Acid		-0.061232	-0.0421016	-0.0159839
Valproic acid�Na		0.960788	0.70923	-0.286152
Valsartan		2.15104	0.935577	0.00590636
Vancomycin�HCl		1.53175	-1.56099	0.039136
Vardenafil		-0.564264	0.0756407	-1.11734
Varenicline Tartrate		0.658484	-0.126856	0.128927
Vecuronium Bromide		-1.00263	-1.97701	-1.32722
Venlafaxine�HCl		0.428245	-1.7407	-0.701444
Verapamil�HCl		0.39263	-0.30798	0.957782
Verapimil		0.923168	1.03486	-1.23451
Veratridine		0.0973591	-0.156232	-0.448454
Vigabatrin		0.0324943	-0.149622	-0.560498
Vinblastine Sulfate		-3.08562	1.74655	0.46295
Vinblastine		-2.13598	0.354174	-1.59104
Vincristine Sulfate		-3.14265	3.87504	0.344619
Vinorelbine		-3.4766	2.91403	-0.378293
Vinpocetine		-0.434822	-1.33426	1.65506
Vismodegib (GDC-0449)		-1.67859	-0.219181	-0.858624
Voriconazole		1.0147	0.646923	-0.439456
Vorinostat		-0.817832	-5.22577	1.37526
W-13 hydrochloride		-0.741428	0.111539	-0.548066
W7		-1.98734	2.40043	0.419576
WIKI4		0.424425	-0.493003	-0.953536
WP1130		-2.39284	-0.987737	1.26895
WY-14643		-0.717922	0.386281	-1.24992
Warfarin		1.11329	-1.20655	-1.10726
Warfarin�Na		0.709033	0.435464	-0.66934
Wiskostatin		-0.0630133	-1.10102	0.573473
Wortmannin		-2.50304	-0.20329	-1.80256
XAV-939		1.71163	-2.06099	1.23926
Xanthotoxin		1.82658	1.38587	-0.601737
Xylitol		0.858453	-0.61589	-0.295103
Y-27632 dihydrochloride monohydrate		-0.286528	-1.37224	-2.88084
Y-27632		-1.55025	-5.89121	-3.23771
YC-1		-0.0083442	-0.0361618	0.776425
YS035		-0.235284	-0.344786	-1.14719
Yangonin		-0.101759	0.98611	-1.09552
Yohimbine		1.44152	0.0832891	-0.0828761
Z-Leu3-VS		-0.19311	-0.520345	-0.804873
Z-VAD(OMe)-FMK		0.576281	0.359326	1.72281
Z-VAD-FMK		0.906382	0.231058	-0.230107
Z-prolyl-prolinal		0.513623	0.222267	-0.500111
Z36		-0.330811	-0.670343	-1.31464
Zafirlukast		0.673355	0.483534	0.491384
Zalcitabine		-0.555888	0.91265	0.00319319
Zaleplon		1.13838	0.534644	-0.673837
Zanamivir		0.491476	-0.669923	0.222632
Zaprinast		0.64831	0.210356	0.585737
Zardaverine		0.170771	1.09092	1.0734
Zearalenone		-0.211661	0.843195	0.559075
Zebularine		1.76958	-0.380797	-0.816027
Zidovudine (3'-Azido-3'-Deoxythymidine)		0.619365	-0.53989	-0.0455043
Zidovudine		0.257909	1.65805	-0.335861
Zileuton		0.0856081	0.127084	-0.061978
Ziprasidone		1.41865	-0.0702142	0.360945
Zoledronic Acid Monohydrate		-0.526848	-2.1695	-1.11158
Zoledronic acid		0.460769	0.585882	-0.895121
Zolmitriptan		-0.0410898	-0.452498	-0.714685
Zonisamide		1.05472	-1.63658	-1.25054
bezafibrate		-0.396644	-1.47453	0.066023
empty		0.0302065	0.194815	-0.393131
rac Perhexiline Maleate		-0.437267	1.53268	0.286066
staurosporine		-	-	-
swainsonine		1.05524	-0.253783	-1.77364
tert-Butylhydro-quinone (TBHQ)		-0.589204	-0.297125	1.52302

## Sheet: Hits
Compound ID	Robust Z-score: MALAT1 nuclear intensity	Robust Z-score: c-myc Granules per cell	Robust Z-score: nuclear count
Carbonyl cyanide 4-(trifluoromethoxy)phenylhydrazone	-5.43377	0.0119194	-1.80473
Diphenyleneiodonium	-4.24374	-1.65379	-2.31656
FTY720	-5.8755	-2.43723	-0.881797
LY-294002	-3.06057	1.28571	0.789785
Niclosamide	-5.90642	0.178326	-2.62344
Perhexiline maleate salt	-3.63805	4.12245	-0.947149
Salinomycin	-5.92653	-1.25022	-0.531668
Selumetinib (AZD6244)	-6.4671	-0.541567	-1.67885
Succinylcholine Chloride�2H2O	-3.13076	0.118524	-0.220508
Thioguanine (6-Thioguanine)	-3.60622	2.94931	-0.26485
Tyrphostin 9	-3.90812	1.2038	-1.06969
